# Supplementary material for: FGF19 promotes cell autophagy and cisplatin chemoresistance by activating MAPK signaling in ovarian cancer
Source: PeerJ. 2023 Feb 2;11:e14827. doi: 10.7717/peerj.14827 (PMC9899438; doi:10.7717/peerj.14827)
Supplement: Supplemental Information 7 [file peerj-11-14827-s007.xlsx]

## Sheet: 板 1 - Sheet1
结果
			HO8910pm-siCon					HO8910pm-siFGF19
		1	2	3	4	5	6	7	8	9	10	11	12
	A	0	0.256	0.231	0.208	0.185	0.195	0.194	0.219	0.209	0.179	0.234		490
	B	24	0.438	0.471	0.487	0.399	0.503	0.463	0.452	0.486	0.397	0.496		490
	C	48	0.759	0.793	0.807	0.713	0.813	0.654	0.708	0.661	0.535	0.72		490
	D	72	1.112	0.998	1.109	0.957	1.102	0.854	0.908	0.891	0.789	0.816		490
	E													490
	F													490
	G													490
	H													490
			HO8910pm-BIRB796					HO8910pm-siFGF19+BIRB796
		1	2	3	4	5	6	7	8	9	10	11	12
	A	0	0.207	0.183	0.247	0.227	0.194	0.228	0.173	0.196	0.254	0.248		490
	B	24	0.462	0.379	0.498	0.481	0.451	0.334	0.389	0.462	0.463	0.491		490
	C	48	0.693	0.615	0.757	0.693	0.638	0.434	0.515	0.609	0.583	0.614		490
	D	72	0.91	0.896	0.766	0.823	0.787	0.597	0.612	0.715	0.679	0.631		490
	E													490
	F													490
	G													490
	H													490
