# Supplementary material for: FGF19 promotes cell autophagy and cisplatin chemoresistance by activating MAPK signaling in ovarian cancer
Source: PeerJ. 2023 Feb 2;11:e14827. doi: 10.7717/peerj.14827 (PMC9899438; doi:10.7717/peerj.14827)
Supplement: Supplemental Information 10 [file peerj-11-14827-s010.xlsx]

## Sheet: mutations list
Gene mutation profiles in HGSOC patients
sample id	gene	mutation type	exon number	description	allele frequency	depth	population frequency	chromosome	position	Reference allele	Alternative allele	dbsnp id	cosmic id	transcript id	hgvs	hgvs c	hgvs p	hgvs p short	class germline
RS1726588FFP	TP53	missense_variant	8	p.C277F	13.72%	2572.0	8.236e-06	17	7577108	C	A	rs763098116	COSM1649337,COSM562338,COSM4271761,COSM10749	NM_000546.5	NM_000546.5(TP53):c.830G>T(p.Cys277Phe)	c.830G>T	p.Cys277Phe	p.C277F	VUS
RS1726588FFP	JUN	missense_variant	1	p.S63T	9.20%	2174.0	0	1	59248556	A	T	-	-	NM_002228.3	NM_002228.3(JUN):c.187T>A(p.Ser63Thr)	c.187T>A	p.Ser63Thr	p.S63T	VUS
RS1726588FFP	RPTOR	missense_variant	6	p.H226P	22.70%	5292.0	0	17	78727832	A	C	-	-	NM_020761.2	NM_020761.2(RPTOR):c.677A>C(p.His226Pro)	c.677A>C	p.His226Pro	p.H226P	VUS
RS1726588FFP	LRP1B	splice_region_variant	75	p.D3844N	17.20%	686.0	0	2	141113911	C	T	-	-	NM_018557.2	NM_018557.2(LRP1B):c.11530G>A(p.Asp3844Asn)	c.11530G>A	p.Asp3844Asn	p.D3844N	VUS
RS1726588FFP	TP63	splice_region_variant	5	c.580-3C>G	15.33%	1696.0	0	3	189582018	C	G	-	-	NM_003722.4	NM_003722.4(TP63):c.580-3C>G	c.580-3C>G	-	-	VUS
RS1726588FFP	CHD1	missense_variant	13	p.R638H	11.62%	482.0	8.237e-05	5	98229198	C	T	rs199778938	-	NM_001270.2	NM_001270.2(CHD1):c.1913G>A(p.Arg638His)	c.1913G>A	p.Arg638His	p.R638H	VUS
RS1802091FFP	DICER1	missense_variant	10	p.I569T	18.64%	1063.0	0	14	95582836	A	G	-	-	NM_177438.2	NM_177438.2(DICER1):c.1706T>C(p.Ile569Thr)	c.1706T>C	p.Ile569Thr	p.I569T	VUS
RS1802091FFP	NF1	stop_gained	20	p.Q803*	26.78%	631.0	0	17	29554622	C	T	-	COSM5386010,COSM5386011	NM_000267.3	NM_000267.3(NF1):c.2407C>T(p.Gln803*)	c.2407C>T	p.Gln803*	p.Q803*	P
RS1802091FFP	SOX10	missense_variant	4	p.K357N	28.50%	200.0	0	22	38369832	C	A	-	-	NM_006941.3	NM_006941.3(SOX10):c.1071G>T(p.Lys357Asn)	c.1071G>T	p.Lys357Asn	p.K357N	VUS
RS1802091FFP	TP53	missense_variant	7	p.R248Q	47.36%	720.0	0.0002	17	7577538	C	T	rs11540652	COSM99021,COSM99020,COSM1640830,COSM3356964,COSM10662,COSM99602	NM_000546.5	NM_000546.5(TP53):c.743G>A(p.Arg248Gln)	c.743G>A	p.Arg248Gln	p.R248Q	LP
RS1804023FFP	ALK	cn_amp	-	cn_amp	3.2	0.23;6;20,20,22,23,24,29	-	2p23.1	2p23.1	7	7	-	-	NM_004304.4	cn_amp	cn_amp	-	-	VUS
RS1804023FFP	MYC	cn_amp	-	cn_amp	3.78	NA;0;NA	-	8q24.21	8q24.21	3	2	-	-	NM_002467.4	cn_amp	cn_amp	-	-	VUS
RS1804023FFP	CCND1	cn_amp	-	cn_amp	3.39	NA;0;NA	-	11q13.3	11q13.3	10	10	-	-	NM_053056.2	cn_amp	cn_amp	-	-	VUS
RS1804023FFP	FGF19	cn_amp	-	cn_amp	3.39	0.38;3;38,38,38	-	11q13.3	11q13.3	8	8	-	-	NM_005117.2	cn_amp	cn_amp	-	-	VUS
RS1804023FFP	TP53	splice_donor_variant	4	c.375+1G>A	25.74%	303.0	0	17	7579311	C	T	-	COSM2744975,COSM3675533,COSM45304,COSM437620,COSM437619	NM_000546.5	NM_000546.5(TP53):c.375+1G>A	c.375+1G>A	-	-	LP
RS1804023FFP	RAD54L	stop_gained	7	p.C179*	19.75%	1347.0	0	1	46726458	C	A	-	-	NM_003579.3	NM_003579.3(RAD54L):c.537C>A(p.Cys179*)	c.537C>A	p.Cys179*	p.C179*	VUS
RS1804023FFP	NF1	disruptive_inframe_deletion	22	p.E962_A966delinsD	4.62%	325.0	0	17	29556887	AACAAACCATAGC	A	-	-	NM_000267.3	NM_000267.3(NF1):c.2886_2897del(p.Glu962_Ala966delinsAsp)	c.2886_2897del	p.Glu962_Ala966delinsAsp	p.E962_A966delinsD	VUS
RS1804023FFP	FOXL2	stop_gained	1	p.Q219*	7.20%	805.0	0	3	138664910	G	A	rs104893741	COSM5708488	NM_023067.3	NM_023067.3(FOXL2):c.655C>T(p.Gln219*)	c.655C>T	p.Gln219*	p.Q219*	VUS
RS1809706FFP	ASXL2	cn_del	-	cn_del	0.87	NA;0;NA	-	2p23.3	2p23.3	6	5	-	-	NM_018263.4	cn_del	cn_del	-	-	VUS
RS1809706FFP	HDAC4	cn_amp	-	cn_amp	4.16	NA;0;NA	-	2q37.3	2q37.3	5	5	-	-	NM_006037.3	cn_amp	cn_amp	-	-	VUS
RS1809706FFP	ARID1B	cn_del	-	cn_del	0.94	0.294;2;26,33	-	6q25.3	6q25.3	23	11	-	-	NM_020732.3	cn_del	cn_del	-	-	VUS
RS1809706FFP	PRKN	cn_del	-	cn_del	0.81	0.31;3;20,31,42	-	6q26	6q26	12	9	-	-	NM_004562.2	cn_del	cn_del	-	-	VUS
RS1809706FFP	PTPRT	cn_amp	-	cn_amp	3.84	0.305;5;12,19,32,44,45	-	20q12	20q12	29	26	-	-	NM_133170.3	cn_amp	cn_amp	-	-	VUS
RS1809706FFP	MYC	cn_amp	-	cn_amp	3.68	0.34;2;34,34	-	8q24.21	8q24.21	3	2	-	-	NM_002467.4	cn_amp	cn_amp	-	-	VUS
RS1809706FFP	CDKN1A	cn_amp	-	cn_amp	3.01	NA;0;NA	-	6p21.2	6p21.2	2	2	-	-	NM_001291549.1	cn_amp	cn_amp	-	-	VUS
RS1809706FFP	PIM1	cn_amp	-	cn_amp	3.77	NA;0;NA	-	6p21.2	6p21.2	4	4	-	-	NM_001243186.1	cn_amp	cn_amp	-	-	VUS
RS1809706FFP	FANCE	cn_amp	-	cn_amp	4.34	NA;0;NA	-	6p21.31	6p21.31	10	8	-	-	NM_021922.2	cn_amp	cn_amp	-	-	VUS
RS1809706FFP	CCND2	cn_amp	-	cn_amp	3.48	NA;0;NA	-	12p13.32	12p13.32	5	5	-	-	NM_001759.3	cn_amp	cn_amp	-	-	VUS
RS1809706FFP	KDM5A	cn_amp	-	cn_amp	3.73	NA;0;NA	-	12p13.33	12p13.33	28	28	-	-	NM_001042603.2	cn_amp	cn_amp	-	-	VUS
RS1809706FFP	RAD52	cn_amp	-	cn_amp	4.09	0.311;2;27,35	-	12p13.33	12p13.33	11	11	-	-	NM_001297419.1	cn_amp	cn_amp	-	-	VUS
RS1809706FFP	CCND1	cn_amp	-	cn_amp	3.77	0.249;10;16,18,20,23,26,26,27,29,30,34	-	11q13.3	11q13.3	10	10	-	-	NM_053056.2	cn_amp	cn_amp	-	-	VUS
RS1809706FFP	FGF19	cn_amp	-	cn_amp	4.13	0.273;1;27	-	11q13.3	11q13.3	8	8	-	-	NM_005117.2	cn_amp	cn_amp	-	-	VUS
RS1809706FFP	CCND3	cn_amp	-	cn_amp	4.73	0.366;2;37,37	-	6p21.1	6p21.1	5	5	-	-	NM_001760.4	cn_amp	cn_amp	-	-	VUS
RS1809706FFP	VEGFA	cn_amp	-	cn_amp	3.89	0.352;1;35	-	6p21.1	6p21.1	9	7	-	-	NM_001025366.2	cn_amp	cn_amp	-	-	VUS
RS1809706FFP	NRAS	missense_variant	2	p.G13C	21.10%	1000.0	0	1	115258745	C	A	rs121434595	COSM570	NM_002524.4	NM_002524.4(NRAS):c.37G>T(p.Gly13Cys)	c.37G>T	p.Gly13Cys	p.G13C	LP
RS1809706FFP	TP53	frameshift_variant	4	p.F54fs	58.06%	856.0	0	17	7579509	GACCTGGGTCTTCAGTGA	G	-	-	NM_000546.5	NM_000546.5(TP53):c.161_177del(p.Phe54fs)	c.161_177del	p.Phe54fs	p.F54fs	LP
RS1809706FFP	TMPRSS2	missense_variant	2	p.L40F	15.50%	2105.0	0	21	42870052	C	A	-	COSM258213,COSM258214	NM_001135099.1	NM_001135099.1(TMPRSS2):c.120G>T(p.Leu40Phe)	c.120G>T	p.Leu40Phe	p.L40F	VUS
RS1809706FFP	BCL6	missense_variant	4	p.P76R	15.08%	1180.0	0	3	187449653	G	C	-	-	NM_001130845.1	NM_001130845.1(BCL6):c.227C>G(p.Pro76Arg)	c.227C>G	p.Pro76Arg	p.P76R	VUS
RS1809706FFP	XIAP	start_lost	2	p.M1?	17.72%	824.0	0	X	123019515	G	A	-	-	NM_001167.3	NM_001167.3(XIAP):c.3G>A(p.Met1?)	c.3G>A	p.Met1?	p.M1?	VUS
RS1810148FFP	TP53	missense_variant	8	p.R273H	73.10%	1803.0	0.000199681	17	7577120	C	T	rs28934576	COSM10660,COSM1645335,COSM99729,COSM3356963	NM_000546.5	NM_000546.5(TP53):c.818G>A(p.Arg273His)	c.818G>A	p.Arg273His	p.R273H	P
RS1810148FFP	GRIN2A	disruptive_inframe_deletion	11	p.T684_G688del	23.36%	1143.0	0	16	9916225	TCCATTAGGCACTGTC	T	-	-	NM_000833.4	NM_000833.4(GRIN2A):c.2049_2063del(p.Thr684_Gly688del)	c.2049_2063del	p.Thr684_Gly688del	p.T684_G688del	VUS
RS1810148FFP	PRKDC	frameshift_variant	31	p.F1244fs	34.25%	1241.0	0	8	48805816	A	AT	-	-	NM_006904.6	NM_006904.6(PRKDC):c.3729_3730insA(p.Phe1244fs)	c.3729_3730insA	p.Phe1244fs	p.F1244fs	VUS
RS1810148FFP	PAX5	missense_variant	3	p.R104C	34.23%	1227.0	0	9	37015094	G	A	-	COSM5047295	NM_016734.2	NM_016734.2(PAX5):c.310C>T(p.Arg104Cys)	c.310C>T	p.Arg104Cys	p.R104C	VUS
RS1813441FFP	FANCA	splice_region_variant	14	c.1359+5G>A	5.30%	2417.0	0	16	89857806	C	T	-	-	NM_000135.2	NM_000135.2(FANCA):c.1359+5G>A	c.1359+5G>A	-	-	VUS
RS1813441FFP	TP53	stop_gained	6	p.R213*	4.82%	3403.0	8.236e-06	17	7578212	G	A	rs397516436	COSM99616,COSM99617,COSM1638393,COSM99618,COSM10654,COSM99615,COSM3378350	NM_000546.5	NM_000546.5(TP53):c.637C>T(p.Arg213*)	c.637C>T	p.Arg213*	p.R213*	P
RS1816937FFP	TP53	missense_variant	7	p.L252P	29.53%	860.0	0	17	7577526	A	G	rs121912653	COSM4735392,COSM148175,COSM4735393,COSM44769,COSM148174	NM_000546.5	NM_000546.5(TP53):c.755T>C(p.Leu252Pro)	c.755T>C	p.Leu252Pro	p.L252P	VUS
RS1816937FFP	CBFB	stop_gained	3	p.E89*	36.68%	638.0	0	16	67070641	G	T	-	-	NM_022845.2	NM_022845.2(CBFB):c.265G>T(p.Glu89*)	c.265G>T	p.Glu89*	p.E89*	P
RS1816937FFP	EPHA5	splice_region_variant	9	c.1794-12T>G	39.76%	254.0	0	4	66242793	A	C	-	-	NM_001281765.2	NM_001281765.2(EPHA5):c.1794-12T>G	c.1794-12T>G	-	-	VUS
RS1816937FFP	TERT	promoter_region_variant	-1	c.-241A>T	32.80%	125.0	0	5	1295345	T	A	-	-	NM_198253.2	NM_198253.2(TERT):c.-241A>T	c.-241A>T	-	-	VUS
RS1816937FFP	GRM3	frameshift_variant	5	p.S808fs	34.30%	758.0	0	7	86479712	TGTCAGCCTGA	T	-	-	NM_000840.2	NM_000840.2(GRM3):c.2421_2430del(p.Ser808fs)	c.2421_2430del	p.Ser808fs	p.S808fs	LP
RS1826281FFP	SOX2	cn_amp	-	cn_amp	3.53	NA;0;NA	-	3q26.33	3q26.33	1	1	-	-	NM_003106.3	cn_amp	cn_amp	-	-	VUS
RS1826281FFP	MAP3K13	cn_amp	-	cn_amp	4.08	0.279;2;22,34	-	3q27.2	3q27.2	11	11	-	-	NM_001242314.1	cn_amp	cn_amp	-	-	VUS
RS1826281FFP	BCL6	cn_amp	-	cn_amp	4.42	0.431;2;43,43	-	3q27.3	3q27.3	8	8	-	-	NM_001130845.1	cn_amp	cn_amp	-	-	VUS
RS1826281FFP	TP63	cn_amp	-	cn_amp	4	NA;0;NA	-	3q28	3q28	16	14	-	-	NM_003722.4	cn_amp	cn_amp	-	-	VUS
RS1826281FFP	FGF12	cn_amp	-	cn_amp	4.73	0.29;1;29	-	3q28	3q28	5	3	-	-	NM_021032.4	cn_amp	cn_amp	-	-	VUS
RS1826281FFP	PIK3CA	cn_amp	-	cn_amp	3.22	NA;0;NA	-	3q26.32	3q26.32	2	2	-	-	NM_006218.3	cn_amp	cn_amp	-	-	VUS
RS1826281FFP	TP53	missense_variant	5	p.V157F	67.51%	1351.0	0	17	7578461	C	A	rs121912654	COSM131483,COSM1679513,COSM10670,COSM131482,COSM3388217,COSM131480,COSM131481	NM_000546.5	NM_000546.5(TP53):c.469G>T(p.Val157Phe)	c.469G>T	p.Val157Phe	p.V157F	LP
RS1826281FFP	PLCG2	missense_variant	7	p.I190T	20.81%	692.0	0	16	81904461	T	C	-	-	NM_002661.4	NM_002661.4(PLCG2):c.569T>C(p.Ile190Thr)	c.569T>C	p.Ile190Thr	p.I190T	VUS
RS1826281FFP	GSK3B	splice_region_variant	8	c.909+5G>A	24.39%	1025.0	0	3	119595255	C	T	-	-	NM_002093.3	NM_002093.3(GSK3B):c.909+5G>A	c.909+5G>A	-	-	VUS
RS1826281FFP	EPHA7	missense_variant	3	p.R86W	28.20%	1447.0	3.22872e-05	6	94120795	G	A	rs770806616	COSM1446507,COSM4782877	NM_004440.3	NM_004440.3(EPHA7):c.256C>T(p.Arg86Trp)	c.256C>T	p.Arg86Trp	p.R86W	VUS
RS1826549FFP	NOTCH2	cn_amp	-	cn_amp	3.4	NA;0;NA	-	1p11.2	1p11.2	34	27	-	-	NM_024408.3	cn_amp	cn_amp	-	-	VUS
RS1826549FFP	FGF14	cn_amp	-	cn_amp	3.3	NA;0;NA	-	13q33.1	13q33.1	4	4	-	-	NM_175929.2	cn_amp	cn_amp	-	-	VUS
RS1826549FFP	RPTOR	cn_amp	-	cn_amp	3.54	NA;0;NA	-	17q25.3	17q25.3	34	30	-	-	NM_020761.2	cn_amp	cn_amp	-	-	VUS
RS1826549FFP	RB1	large_genomic_rearrangement	18-27	exon18-27cn_del	0.58	0.323;1;32	-	13q14.2	49027097-49054260(+)	27	9	-	-	NM_000321.2	NM_000321.2(RB1):exon18-27cn_del	exon18-27cn_del	-	-	LP
RS1826549FFP	CCND3	cn_amp	-	cn_amp	3.62	NA;0;NA	-	6p21.1	6p21.1	5	5	-	-	NM_001760.4	cn_amp	cn_amp	-	-	VUS
RS1826549FFP	TP53	missense_variant	6	p.I195F	59.46%	1285	0	17	7578266	T	A	rs942158624	COSM1731912,COSM44633,COSM129840,COSM129842,COSM129843,COSM3388199,COSM129841	NM_000546.5	NM_000546.5(TP53):c.583A>T(p.Ile195Phe)	c.583A>T	p.Ile195Phe	p.I195F	LP
RS1826549FFP	CTCF	splice_acceptor_variant	3	c.-9-2A>G	18.55%	663	0	16	67644725	A	G	-	-	NM_006565.3	NM_006565.3(CTCF):c.-9-2A>G	c.-9-2A>G	-	-	LP
RS1826549FFP	PTPRS	missense_variant	20	p.N1120S	39.95%	1612	6.47291e-05	19	5221107	T	C	rs372506721	COSM2152679,COSM4781800	NM_002850.3	NM_002850.3(PTPRS):c.3359A>G(p.Asn1120Ser)	c.3359A>G	p.Asn1120Ser	p.N1120S	VUS
RS1826549FFP	NCOA3	conservative_inframe_deletion	20	p.Q1273_Q1276del	2.56%	938	0	20	46279824	GCAGCAGCAGCAACAG	GCAA	-	-	NM_181659.2	NM_181659.2(NCOA3):c.3753_3765delinsA(p.Gln1273_Gln1276del)	c.3753_3765delinsA	p.Gln1273_Gln1276del	p.Q1273_Q1276del	VUS
RS1826549FFP	KMT2C	frameshift_variant	45	p.K3929fs	48.13%	2063	0	7	151853308	CTCCGGCTT	C	-	-	NM_170606.2	NM_170606.2(KMT2C):c.11786_11793del(p.Lys3929fs)	c.11786_11793del	p.Lys3929fs	p.K3929fs	LP
RS1826549FFP	CARD11	missense_variant	18	p.N783S	61.45%	1035	0	7	2959168	T	C	-	-	NM_032415.5	NM_032415.5(CARD11):c.2348A>G(p.Asn783Ser)	c.2348A>G	p.Asn783Ser	p.N783S	VUS
RS1826550FFP	EMSY	cn_amp	-	cn_amp	3.42	NA;0;NA	-	11q13.5	11q13.5	20	20	-	-	NM_001300942.1	cn_amp	cn_amp	-	-	VUS
RS1826550FFP	PAK1	cn_amp	-	cn_amp	3.84	NA;0;NA	-	11q13.5	11q13.5	5	5	-	-	NM_001128620.1	cn_amp	cn_amp	-	-	VUS
RS1826550FFP	FAT3	cn_amp	-	cn_amp	3.52	0.436;1;44	-	11q14.3	11q14.3	25	18	-	-	NM_001008781.2	cn_amp	cn_amp	-	-	VUS
RS1826550FFP	BRCA2	cn_amp	-	cn_amp	3.35	0.139;1;14	-	13q13.1	13q13.1	24	22	-	-	NM_000059.3	cn_amp	cn_amp	-	-	VUS
RS1826550FFP	ATM	cn_amp	-	cn_amp	3.56	0.198;10;11,12,14,14,17,17,18,20,34,40	-	11q22.3	11q22.3	57	56	-	-	NM_000051.3	cn_amp	cn_amp	-	-	VUS
RS1826550FFP	FLT3	cn_amp	-	cn_amp	3.47	0.396;2;39,40	-	13q12.2	13q12.2	22	18	-	-	NM_004119.2	cn_amp	cn_amp	-	-	VUS
RS1826550FFP	FLT1	cn_amp	-	cn_amp	3.36	0.382;1;38	-	13q12.2	13q12.2	31	15	-	-	NM_002019.4	cn_amp	cn_amp	-	-	VUS
RS1826550FFP	MRE11	cn_amp	-	cn_amp	3.55	NA;0;NA	-	11q21	11q21	18	16	-	-	NM_005591.3	cn_amp	cn_amp	-	-	VUS
RS1826550FFP	PGR	cn_amp	-	cn_amp	3.67	0.39;2;39,39	-	11q22.1	11q22.1	7	7	-	-	NM_000926.4	cn_amp	cn_amp	-	-	VUS
RS1826550FFP	MYC	cn_amp	-	cn_amp	3.85	NA;0;NA	-	8q24.21	8q24.21	3	2	-	-	NM_002467.4	cn_amp	cn_amp	-	-	VUS
RS1826550FFP	TP53	missense_variant	4	p.K120E	60.08%	491	0	17	7579329	T	C	rs121912658	COSM1522474,COSM44827,COSM1709736,COSM3522714,COSM1522473	NM_000546.5	NM_000546.5(TP53):c.358A>G(p.Lys120Glu)	c.358A>G	p.Lys120Glu	p.K120E	LP
RS1826550FFP	FANCD2	missense_variant	36	p.E1194Q	18.50%	1784	0	3	10130531	G	C	-	-	NM_001018115.2	NM_001018115.2(FANCD2):c.3580G>C(p.Glu1194Gln)	c.3580G>C	p.Glu1194Gln	p.E1194Q	VUS
RS1826550FFP	KDR	missense_variant	13	p.K611T	18.28%	1876	0	4	55970965	T	G	-	-	NM_002253.2	NM_002253.2(KDR):c.1832A>C(p.Lys611Thr)	c.1832A>C	p.Lys611Thr	p.K611T	VUS
RS1826550FFP	TAF1	missense_variant	12	p.P639L	11.39%	1738	0	X	70602923	C	T	-	-	NM_001286074.1	NM_001286074.1(TAF1):c.1916C>T(p.Pro639Leu)	c.1916C>T	p.Pro639Leu	p.P639L	VUS
RS1827935FFP	TP53	missense_variant	6	p.Y220C	50.62%	1367.0	2.471e-05	17	7578190	T	C	rs121912666	COSM3355993,COSM10758,COSM99719,COSM1644277,COSM99720,COSM99718	NM_000546.5	NM_000546.5(TP53):c.659A>G(p.Tyr220Cys)	c.659A>G	p.Tyr220Cys	p.Y220C	LP
RS1828468FFP	BRAF	cn_amp	-	cn_amp	3.33	0.224;19;10,11,15,15,18,20,20,20,21,21,21,22,23,24,30,32,32,34,36	-	7q34	7q34	27	22	-	-	NM_004333.4	cn_amp	cn_amp	-	-	VUS
RS1828468FFP	MUTYH	cn_amp	-	cn_amp	3.34	0.351;2;35,35	-	1p34.1	1p34.1	10	5	-	-	NM_001128425.1	cn_amp	cn_amp	-	-	VUS
RS1828468FFP	KEL	cn_amp	-	cn_amp	4.42	NA;0;NA	-	7q34	7q34	4	4	-	-	NM_000420.2	cn_amp	cn_amp	-	-	VUS
RS1828468FFP	DAXX	cn_amp	-	cn_amp	3.23	0.444;2;44,44	-	6p21.32	6p21.32	8	8	-	-	NM_001141970.1	cn_amp	cn_amp	-	-	VUS
RS1828468FFP	FGFR3	cn_amp	-	cn_amp	3.65	0.255;5;13,28,28,29,29	-	4p16.3	4p16.3	9	7	-	-	NM_000142.4	cn_amp	cn_amp	-	-	VUS
RS1828468FFP	CDKN2C	cn_amp	-	cn_amp	3.58	NA;0;NA	-	1p32.3	1p32.3	2	2	-	-	NM_001262.2	cn_amp	cn_amp	-	-	VUS
RS1828468FFP	EZH2	cn_amp	-	cn_amp	3.51	0.248;5;21,21,22,22,38	-	7q36.1	7q36.1	19	17	-	-	NM_004456.4	cn_amp	cn_amp	-	-	VUS
RS1828468FFP	RAD54L	cn_amp	-	cn_amp	3.59	NA;0;NA	-	1p34.1	1p34.1	17	17	-	-	NM_003579.3	cn_amp	cn_amp	-	-	VUS
RS1828468FFP	KMT2C	cn_amp	-	cn_amp	3.45	0.197;12;10,11,14,15,15,15,16,17,24,24,38,38	-	7q36.1	7q36.1	60	37	-	-	NM_170606.2	cn_amp	cn_amp	-	-	VUS
RS1828468FFP	SF3B1	cn_amp	-	cn_amp	3.68	0.303;8;12,13,30,32,35,37,38,45	-	2q33.1	2q33.1	26	25	-	-	NM_012433.3	cn_amp	cn_amp	-	-	VUS
RS1828468FFP	CASP8	cn_amp	-	cn_amp	3.36	0.318;2;32,32	-	2q33.1	2q33.1	7	7	-	-	NM_001228.4	cn_amp	cn_amp	-	-	VUS
RS1828468FFP	IDH1	cn_amp	-	cn_amp	4.16	0.167;1;17	-	2q34	2q34	8	8	-	-	NM_005896.3	cn_amp	cn_amp	-	-	VUS
RS1828468FFP	ERBB4	cn_amp	-	cn_amp	3.51	0.252;9;12,13,13,19,19,37,37,37,41	-	2q34	2q34	30	30	-	-	NM_005235.2	cn_amp	cn_amp	-	-	VUS
RS1828468FFP	BARD1	cn_amp	-	cn_amp	3.18	0.365;7;14,38,39,39,40,43,43	-	2q35	2q35	11	9	-	-	NM_000465.3	cn_amp	cn_amp	-	-	VUS
RS1828468FFP	CDKN1A	cn_amp	-	cn_amp	3.24	NA;0;NA	-	6p21.2	6p21.2	2	2	-	-	NM_001291549.1	cn_amp	cn_amp	-	-	VUS
RS1828468FFP	PIM1	cn_amp	-	cn_amp	3.2	NA;0;NA	-	6p21.2	6p21.2	4	4	-	-	NM_001243186.1	cn_amp	cn_amp	-	-	VUS
RS1828468FFP	FANCE	cn_amp	-	cn_amp	3.2	0.434;2;43,44	-	6p21.31	6p21.31	10	8	-	-	NM_021922.2	cn_amp	cn_amp	-	-	VUS
RS1828468FFP	STK40	cn_amp	-	cn_amp	3.24	0.309;2;24,38	-	1p34.3	1p34.3	8	8	-	-	NM_001282546.1	cn_amp	cn_amp	-	-	VUS
RS1828468FFP	CSF3R	cn_amp	-	cn_amp	3.67	0.386;1;39	-	1p34.3	1p34.3	12	12	-	-	NM_156039.3	cn_amp	cn_amp	-	-	VUS
RS1828468FFP	PRDM1	cn_del	-	cn_del	0.96	0.125;1;13	-	6q21	6q21	8	4	-	-	NM_001198.3	cn_del	cn_del	-	-	P
RS1828468FFP	CCND2	cn_amp	-	cn_amp	2.99	0.129;4;12,12,13,13	-	12p13.32	12p13.32	5	5	-	-	NM_001759.3	cn_amp	cn_amp	-	-	VUS
RS1828468FFP	KDM5A	cn_amp	-	cn_amp	4.95	0.151;1;15	-	12p13.33	12p13.33	28	28	-	-	NM_001042603.2	cn_amp	cn_amp	-	-	VUS
RS1828468FFP	RAD52	cn_amp	-	cn_amp	3.61	NA;0;NA	-	12p13.33	12p13.33	11	11	-	-	NM_001297419.1	cn_amp	cn_amp	-	-	VUS
RS1828468FFP	MPL	cn_amp	-	cn_amp	3.35	NA;0;NA	-	1p34.2	1p34.2	12	12	-	-	NM_005373.2	cn_amp	cn_amp	-	-	VUS
RS1828468FFP	JAK3	cn_amp	-	cn_amp	4.22	0.338;4;28,35,36,37	-	19p13.11	19p13.11	21	19	-	-	NM_000215.3	cn_amp	cn_amp	-	-	VUS
RS1828468FFP	PIK3R2	cn_amp	-	cn_amp	4.02	0.39;1;39	-	19p13.11	19p13.11	14	14	-	-	NM_005027.3	cn_amp	cn_amp	-	-	VUS
RS1828468FFP	MEF2B	cn_amp	-	cn_amp	3.6	NA;0;NA	-	19p13.11	19p13.11	7	5	-	-	NM_001145785.1	cn_amp	cn_amp	-	-	VUS
RS1828468FFP	PMS1	cn_amp	-	cn_amp	3.49	NA;0;NA	-	2q32.2	2q32.2	12	12	-	-	NM_000534.4	cn_amp	cn_amp	-	-	VUS
RS1828468FFP	CCND3	cn_amp	-	cn_amp	4.04	NA;0;NA	-	6p21.1	6p21.1	5	5	-	-	NM_001760.4	cn_amp	cn_amp	-	-	VUS
RS1828468FFP	VEGFA	cn_amp	-	cn_amp	3.43	NA;0;NA	-	6p21.1	6p21.1	9	7	-	-	NM_001025366.2	cn_amp	cn_amp	-	-	VUS
RS1828468FFP	TP53	missense_variant	10	p.R337L	53.48%	647.0	0	17	7574017	C	A	rs121912664	COSM220135,COSM11411	NM_000546.5	NM_000546.5(TP53):c.1010G>T(p.Arg337Leu)	c.1010G>T	p.Arg337Leu	p.R337L	LP
RS1828468FFP	CDKN1C	missense_variant	1	p.C30S	18.00%	411.0	0	11	2906631	C	G	-	-	NM_000076.2	NM_000076.2(CDKN1C):c.89G>C(p.Cys30Ser)	c.89G>C	p.Cys30Ser	p.C30S	VUS
RS1828468FFP	IDH2	splice_region_variant	4	c.534+5G>T	20.17%	1279.0	0	15	90631814	C	A	-	-	NM_002168.3	NM_002168.3(IDH2):c.534+5G>T	c.534+5G>T	-	-	VUS
RS1828468FFP	AXL	disruptive_inframe_deletion	20	p.A837_P846del	11.94%	821.0	0	19	41765632	TGCAGGAGGAGCTGACCCCCCAACCCAGCCA	T	-	-	NM_021913.4	NM_021913.4(AXL):c.2510_2539del(p.Ala837_Pro846del)	c.2510_2539del	p.Ala837_Pro846del	p.A837_P846del	VUS
RS1828468FFP	RANBP2	missense_variant	20	p.A1770P	15.79%	1818.0	0	2	109382303	G	C	-	-	NM_006267.4	NM_006267.4(RANBP2):c.5308G>C(p.Ala1770Pro)	c.5308G>C	p.Ala1770Pro	p.A1770P	VUS
RS1828468FFP	EP300	missense_variant	4	p.K336N	26.62%	1555.0	0	22	41523592	G	C	-	-	NM_001429.3	NM_001429.3(EP300):c.1008G>C(p.Lys336Asn)	c.1008G>C	p.Lys336Asn	p.K336N	VUS
RS1828468FFP	EPHB1	stop_gained	2	p.L22*	17.13%	2032.0	0	3	134644664	T	A	-	-	NM_004441.4	NM_004441.4(EPHB1):c.65T>A(p.Leu22*)	c.65T>A	p.Leu22*	p.L22*	P
RS1828468FFP	PBRM1	missense_variant	15	p.D544Y	2.38%	1304.0	0	3	52651466	C	A	-	-	NM_018313.4	NM_018313.4(PBRM1):c.1630G>T(p.Asp544Tyr)	c.1630G>T	p.Asp544Tyr	p.D544Y	VUS
RS1828468FFP	PIK3CG	missense_variant	2	p.M70L	2.45%	2043.0	0	7	106508214	A	C	rs201310075	-	NM_001282426.1	NM_001282426.1(PIK3CG):c.208A>C(p.Met70Leu)	c.208A>C	p.Met70Leu	p.M70L	VUS
RS1828468FFP	KMT2C	missense_variant	15	p.S859C	8.15%	601.0	0	7	151935868	G	C	-	-	NM_170606.2	NM_170606.2(KMT2C):c.2576C>G(p.Ser859Cys)	c.2576C>G	p.Ser859Cys	p.S859C	VUS
RS1828468FFP	NOTCH1	missense_variant	31	p.S1951T	34.75%	728.0	0	9	139395086	C	G	-	-	NM_017617.4	NM_017617.4(NOTCH1):c.5852G>C(p.Ser1951Thr)	c.5852G>C	p.Ser1951Thr	p.S1951T	VUS
RS1831345FFP	RB1	frameshift_variant	22	p.T766fs	3.99%	526	0	13	49039214	GAAAAC	G	-	-	NM_000321.2	NM_000321.2(RB1):c.2296_2300del(p.Thr766fs)	c.2296_2300del	p.Thr766fs	p.T766fs	LP
RS1831345FFP	PRDM1	missense_variant	5	p.E369L	3.78%	6186	0	6	106553140	GA	TT	-	-	NM_001198.3	NM_001198.3(PRDM1):c.1105_1106delinsTT(p.Glu369Leu)	c.1105_1106delinsTT	p.Glu369Leu	p.E369L	VUS
RS1831345FFP	NF1	missense_variant	22	p.G984E	2.64%	870	0	17	29556953	G	A	-	-	NM_000267.3	NM_000267.3(NF1):c.2951G>A(p.Gly984Glu)	c.2951G>A	p.Gly984Glu	p.G984E	VUS
RS1832863FFP	SOX2	cn_amp	-	cn_amp	3.63	NA;0;NA	-	3q26.33	3q26.33	1	1	-	-	NM_003106.3	cn_amp	cn_amp	-	-	VUS
RS1832863FFP	RPS6KA4	cn_amp	-	cn_amp	4.14	NA;0;NA	-	11q13.1	11q13.1	5	5	-	-	NM_003942.2	cn_amp	cn_amp	-	-	VUS
RS1832863FFP	RPS6KB2	cn_amp	-	cn_amp	2.94	NA;0;NA	-	11q13.2	11q13.2	5	4	-	-	NM_003952.2	cn_amp	cn_amp	-	-	VUS
RS1832863FFP	ALK	cn_amp	-	cn_amp	3.27	0.332;13;28,29,31,32,32,33,33,34,34,34,36,36,39	-	2p23.1	2p23.1	7	7	-	-	NM_004304.4	cn_amp	cn_amp	-	-	VUS
RS1832863FFP	ZFHX3	cn_del	-	cn_del	0.5	NA;0;NA	-	16q22.2	16q22.2	4	3	-	-	NM_006885.3	cn_del	cn_del	-	-	VUS
RS1832863FFP	CHD1	cn_del	-	cn_del	0.78	0.182;5;11,13,20,22,24	-	5q15	5q15	35	33	-	-	NM_001270.2	cn_del	cn_del	-	-	P
RS1832863FFP	APC	cn_del	-	cn_del	0.71	0.189;1;19	-	5q22.2	5q22.2	15	14	-	-	NM_000038.5	cn_del	cn_del	-	-	P
RS1832863FFP	KMT2A	cn_amp	-	cn_amp	3.25	0.211;1;21	-	11q23.3	11q23.3	38	26	-	-	NM_001197104.1	cn_amp	cn_amp	-	-	VUS
RS1832863FFP	CBL	cn_amp	-	cn_amp	3.53	NA;0;NA	-	11q23.3	11q23.3	16	9	-	-	NM_005188.3	cn_amp	cn_amp	-	-	VUS
RS1832863FFP	NFKBIA	cn_amp	-	cn_amp	4.75	0.425;2;41,44	-	14q13.2	14q13.2	6	6	-	-	NM_020529.2	cn_amp	cn_amp	-	-	VUS
RS1832863FFP	CHEK1	cn_amp	-	cn_amp	3.78	0.305;3;23,34,34	-	11q24.2	11q24.2	11	6	-	-	NM_001274.5	cn_amp	cn_amp	-	-	VUS
RS1832863FFP	CCND1	cn_amp	-	cn_amp	4.04	0.28;1;28	-	11q13.3	11q13.3	10	10	-	-	NM_053056.2	cn_amp	cn_amp	-	-	VUS
RS1832863FFP	FGF19	cn_amp	-	cn_amp	4.28	0.322;3;31,33,33	-	11q13.3	11q13.3	8	8	-	-	NM_005117.2	cn_amp	cn_amp	-	-	VUS
RS1832863FFP	FGF4	cn_amp	-	cn_amp	3.73	0.289;1;29	-	11q13.3	11q13.3	6	4	-	-	NM_002007.2	cn_amp	cn_amp	-	-	VUS
RS1832863FFP	FGF3	cn_amp	-	cn_amp	4.35	0.314;9;29,30,31,31,32,32,32,33,35	-	11q13.3	11q13.3	9	8	-	-	NM_005247.2	cn_amp	cn_amp	-	-	VUS
RS1832863FFP	MAP3K13	cn_amp	-	cn_amp	3.82	NA;0;NA	-	3q27.2	3q27.2	11	11	-	-	NM_001242314.1	cn_amp	cn_amp	-	-	VUS
RS1832863FFP	BCL6	cn_amp	-	cn_amp	4.11	NA;0;NA	-	3q27.3	3q27.3	8	8	-	-	NM_001130845.1	cn_amp	cn_amp	-	-	VUS
RS1832863FFP	TP63	cn_amp	-	cn_amp	3.49	0.275;4;26,26,28,29	-	3q28	3q28	16	14	-	-	NM_003722.4	cn_amp	cn_amp	-	-	VUS
RS1832863FFP	FGF12	cn_amp	-	cn_amp	3.93	0.188;2;15,22	-	3q28	3q28	5	3	-	-	NM_021032.4	cn_amp	cn_amp	-	-	VUS
RS1832863FFP	MEN1	cn_amp	-	cn_amp	3.34	0.302;2;30,30	-	11q13.1	11q13.1	8	5	-	-	NM_000244.3	-	-	-	-	VUS
RS1832863FFP	PIK3CA	cn_amp	-	cn_amp	3.93	NA;0;NA	-	3q26.32	3q26.32	2	2	-	-	NM_006218.3	cn_amp	cn_amp	-	-	VUS
RS1832863FFP	ARID1A	missense_variant	10	p.L970I	26.43%	753	0	1	27092977	C	A	-	-	NM_006015.4	NM_006015.4(ARID1A):c.2908C>A(p.Leu970Ile)	c.2908C>A	p.Leu970Ile	p.L970I	VUS
RS1832863FFP	CHEK1	missense_variant	10	p.V339L	23.13%	2309	0	11	125514077	G	C	-	-	NM_001274.5	NM_001274.5(CHEK1):c.1015G>C(p.Val339Leu)	c.1015G>C	p.Val339Leu	p.V339L	VUS
RS1832863FFP	KMT2C	missense_variant	17	p.N938H	83.17%	606	0	7	151927364	T	G	-	-	NM_170606.2	NM_170606.2(KMT2C):c.2812A>C(p.Asn938His)	c.2812A>C	p.Asn938His	p.N938H	VUS
RS1832863FFP	TP53	missense_variant	5	p.Q136E	74.00%	773	0	17	7578524	G	C	-	COSM43767,COSM437598,COSM437597,COSM3403290,COSM437599,COSM2153121,COSM437600	NM_000546.5	NM_000546.5(TP53):c.406C>G(p.Gln136Glu)	c.406C>G	p.Gln136Glu	p.Q136E	VUS
RS1843874FFP	PTK2	cn_amp	-	cn_amp	4.22	NA;0;NA	-	8q24.3	8q24.3	5	5	-	-	NM_005607.4	cn_amp	cn_amp	-	-	VUS
RS1843874FFP	MYC	cn_amp	-	cn_amp	3.43	NA;0;NA	-	8q24.21	8q24.21	3	2	-	-	NM_002467.4	cn_amp	cn_amp	-	-	VUS
RS1843874FFP	GNAS	cn_amp	-	cn_amp	3.51	0.228;2;23,23	-	20q13.32	20q13.32	12	12	-	-	NM_080425.3	cn_amp	cn_amp	-	-	VUS
RS1843874FFP	RICTOR	cn_amp	-	cn_amp	3.59	0.181;4;12,13,15,32	-	5p13.1	5p13.1	38	35	-	-	NM_001285439.1	cn_amp	cn_amp	-	-	VUS
RS1843874FFP	ATM	missense_variant	53	p.A2626D	21.74%	1251	0	11	108203577	C	A	-	-	NM_000051.3	NM_000051.3(ATM):c.7877C>A(p.Ala2626Asp)	c.7877C>A	p.Ala2626Asp	p.A2626D	VUS
RS1843874FFP	FOXA1	missense_variant	2	p.H374Q	14.48%	663	0	14	38060867	G	T	-	-	NM_004496.3	NM_004496.3(FOXA1):c.1122C>A(p.His374Gln)	c.1122C>A	p.His374Gln	p.H374Q	VUS
RS1843874FFP	GNAS	missense_variant	1	p.P497S	22.80%	1684	7.10944e-06	20	57429809	C	T	-	-	NM_080425.3	NM_080425.3(GNAS):c.1489C>T(p.Pro497Ser)	c.1489C>T	p.Pro497Ser	p.P497S	VUS
RS1843874FFP	FGF3	missense_variant	2	p.R104Q	19.48%	2659	0	11	69631101	C	T	rs150581924	COSM1298534	NM_005247.2	NM_005247.2(FGF3):c.311G>A(p.Arg104Gln)	c.311G>A	p.Arg104Gln	p.R104Q	VUS
RS1850251FFP	PTK2	cn_amp	-	cn_amp	5.13	NA;0;NA	-	8q24.3	8q24.3	5	5	-	-	NM_005607.4	cn_amp	cn_amp	-	-	VUS
RS1850251FFP	MUTYH	cn_amp	-	cn_amp	3.69	0.344;4;34,34,34,34	-	1p34.1	1p34.1	10	5	-	-	NM_001128425.1	cn_amp	cn_amp	-	-	VUS
RS1850251FFP	RPS6KA4	cn_amp	-	cn_amp	4.16	NA;0;NA	-	11q13.1	11q13.1	5	5	-	-	NM_003942.2	cn_amp	cn_amp	-	-	VUS
RS1850251FFP	RPS6KB2	cn_amp	-	cn_amp	3.55	NA;0;NA	-	11q13.2	11q13.2	5	4	-	-	NM_003952.2	cn_amp	cn_amp	-	-	VUS
RS1850251FFP	RAD54L	cn_amp	-	cn_amp	3.58	0.385;1;39	-	1p34.1	1p34.1	17	17	-	-	NM_003579.3	cn_amp	cn_amp	-	-	VUS
RS1850251FFP	MYC	cn_amp	-	cn_amp	3.37	0.184;2;18,18	-	8q24.21	8q24.21	3	2	-	-	NM_002467.4	cn_amp	cn_amp	-	-	VUS
RS1850251FFP	CHD4	cn_amp	-	cn_amp	3.96	0.206;3;11,17,34	-	12p13.31	12p13.31	29	29	-	-	NM_001273.3	cn_amp	cn_amp	-	-	VUS
RS1850251FFP	MPL	cn_amp	-	cn_amp	3.77	NA;0;NA	-	1p34.2	1p34.2	12	12	-	-	NM_005373.2	cn_amp	cn_amp	-	-	VUS
RS1850251FFP	CCND1	cn_amp	-	cn_amp	3.55	NA;0;NA	-	11q13.3	11q13.3	10	10	-	-	NM_053056.2	cn_amp	cn_amp	-	-	VUS
RS1850251FFP	FGF19	cn_amp	-	cn_amp	4.24	0.358;5;33,33,34,40,40	-	11q13.3	11q13.3	8	8	-	-	NM_005117.2	cn_amp	cn_amp	-	-	VUS
RS1850251FFP	MEN1	cn_amp	-	cn_amp	3.7	0.386;2;39,39	-	11q13.1	11q13.1	8	5	-	-	NM_000244.3	-	-	-	-	VUS
RS1850251FFP	PGR	missense_variant	1	p.R492L	55.05%	307	0.00432633	11	100998327	C	A	rs753242711	-	NM_000926.4	NM_000926.4(PGR):c.1475G>T(p.Arg492Leu)	c.1475G>T	p.Arg492Leu	p.R492L	LB
RS1850251FFP	ABL1	missense_variant	11	p.R764Q	18.91%	2676	0.000522709	9	133759968	G	A	rs575721187	-	NM_005157.5	NM_005157.5(ABL1):c.2291G>A(p.Arg764Gln)	c.2291G>A	p.Arg764Gln	p.R764Q	VUS
RS1850251FFP	ZFHX3	disruptive_inframe_deletion	10	p.G3518_G3519del	62.93%	793	0.000680272	16	72821618	ACCGCCG	A	rs779328013	-	NM_006885.3	NM_006885.3(ZFHX3):c.10551_10556del(p.Gly3518_Gly3519del)	c.10551_10556del	p.Gly3518_Gly3519del	p.G3518_G3519del	VUS
RS1850251FFP	FANCE	splice_region_variant	5	p.R371W	43.60%	3436	0.000117769	6	35426215	C	T	rs775076977	-	NM_021922.2	NM_021922.2(FANCE):c.1111C>T(p.Arg371Trp)	c.1111C>T	p.Arg371Trp	p.R371W	LP
RS1850251FFP	ZFHX3	disruptive_inframe_deletion	10	p.G3520_G3522del	2.27%	794	0.00047247	16	72821609	GCCGCCGCCA	G	rs775190963	-	NM_006885.3	NM_006885.3(ZFHX3):c.10557_10565del(p.Gly3520_Gly3522del)	c.10557_10565del	p.Gly3520_Gly3522del	p.G3520_G3522del	VUS
RS1850251FFP	H3F3C	missense_variant	1	p.Q85H	25.30%	10815	0	12	31944846	C	A	-	-	NM_001013699.2	NM_001013699.2(H3F3C):c.255G>T(p.Gln85His)	c.255G>T	p.Gln85His	p.Q85H	VUS
RS1850251FFP	NTRK3	splice_region_variant	13	p.V432I	86.94%	3952	0.0008	15	88669604	C	T	rs771227484	-	NM_001012338.2	NM_001012338.2(NTRK3):c.1294G>A(p.Val432Ile)	c.1294G>A	p.Val432Ile	p.V432I	VUS
RS1850251FFP	RANBP2	missense_variant	20	p.K1446R	48.71%	3529	0.0001	2	109381332	A	G	rs766135134	-	NM_006267.4	NM_006267.4(RANBP2):c.4337A>G(p.Lys1446Arg)	c.4337A>G	p.Lys1446Arg	p.K1446R	VUS
RS1850251FFP	MSH2	missense_variant	6	p.Q324H	52.34%	2862	0	2	47643464	G	C	-	-	NM_000251.2	NM_000251.2(MSH2):c.972G>C(p.Gln324His)	c.972G>C	p.Gln324His	p.Q324H	VUS
RS1850251FFP	MSH6	missense_variant	4	p.M492T	42.02%	2368	0	2	48026597	T	C	-	-	NM_000179.2	NM_000179.2(MSH6):c.1475T>C(p.Met492Thr)	c.1475T>C	p.Met492Thr	p.M492T	VUS
RS1850251FFP	TP53	missense_variant	7	p.Y234C	62.77%	1276	8.236e-06	17	7577580	T	C	rs587780073	COSM10725,COSM3388193,COSM165072,COSM165074,COSM165073,COSM1646849	NM_000546.5	NM_000546.5(TP53):c.701A>G(p.Tyr234Cys)	c.701A>G	p.Tyr234Cys	p.Y234C	LP
RS1850253FFP	BRCA1	stop_gained	10	p.K338*	61.59%	1674	0	17	41246536	T	A	rs397508826	-	NM_007294.3	NM_007294.3(BRCA1):c.1012A>T(p.Lys338*)	c.1012A>T	p.Lys338*	p.K338*	P
RS1850253FFP	ARID1B	disruptive_inframe_insertion	1	p.G314_G315dup	14.73%	482	0.000530898	6	157099981	G	GGGCGGC	rs797045286	-	NM_020732.3	NM_020732.3(ARID1B):c.939_944dup(p.Gly314_Gly315dup)	c.939_944dup	p.Gly314_Gly315dup	p.G314_G315dup	LB
RS1850253FFP	KMT2D	missense_variant	39	p.A3805S	45.75%	1836	0	12	49427075	C	A	-	-	NM_003482.3	NM_003482.3(KMT2D):c.11413G>T(p.Ala3805Ser)	c.11413G>T	p.Ala3805Ser	p.A3805S	VUS
RS1850253FFP	KMT2D	missense_variant	11	p.A1123T	52.46%	2821	0	12	49444004	C	T	-	-	NM_003482.3	NM_003482.3(KMT2D):c.3367G>A(p.Ala1123Thr)	c.3367G>A	p.Ala1123Thr	p.A1123T	VUS
RS1850253FFP	MAP2K1	missense_variant	2	p.Q46L	5.45%	2898	0	15	66727421	A	T	-	-	NM_002755.3	NM_002755.3(MAP2K1):c.137A>T(p.Gln46Leu)	c.137A>T	p.Gln46Leu	p.Q46L	VUS
RS1850253FFP	EP300	missense_variant	31	p.L2054F	49.63%	6137	0	22	41573875	C	T	-	COSM3554895	NM_001429.3	NM_001429.3(EP300):c.6160C>T(p.Leu2054Phe)	c.6160C>T	p.Leu2054Phe	p.L2054F	VUS
RS1850253FFP	ARID1B	missense_variant	9	p.M882T	56.07%	5755	0	6	157469851	T	C	-	-	NM_020732.3	NM_020732.3(ARID1B):c.2645T>C(p.Met882Thr)	c.2645T>C	p.Met882Thr	p.M882T	VUS
RS1850253FFP	TP53	missense_variant	5	p.S127F	12.89%	2654	0	17	7578550	G	A	rs730881999	COSM44226,COSM1637542,COSM216413,COSM216412,COSM216414,COSM3378368	NM_000546.5	NM_000546.5(TP53):c.380C>T(p.Ser127Phe)	c.380C>T	p.Ser127Phe	p.S127F	LP
RS1850253FFP	TSC1	stop_gained	15	p.R509*	55.43%	1851	0	9	135781440	G	A	rs118203542	-	NM_000368.4	NM_000368.4(TSC1):c.1525C>T(p.Arg509*)	c.1525C>T	p.Arg509*	p.R509*	P
RS1850267FFP	JAK2	cn_del	-	cn_del	1.04	0.211;4;17,20,23,25	-	9p24.1	9p24.1	23	21	-	-	NM_004972.3	cn_del	cn_del	-	-	VUS
RS1850267FFP	CD274	cn_del	-	cn_del	0.75	0.314;3;30,31,33	-	9p24.1	9p24.1	9	8	-	-	NM_014143.3	cn_del	cn_del	-	-	VUS
RS1850267FFP	WT1	cn_amp	-	cn_amp	3.95	0.32;6;29,31,32,32,34,34	-	11p13	11p13	12	11	-	-	NM_024426.4	cn_amp	cn_amp	-	-	VUS
RS1850267FFP	CDKN2A	cn_del	-	cn_del	0.49	NA;0;NA	-	9p21.3	9p21.3	5	5	-	-	NM_000077.4	cn_del	cn_del	-	-	P
RS1850267FFP	CDKN2B	cn_del	-	cn_del	0.48	NA;0;NA	-	9p21.3	9p21.3	2	2	-	-	NM_004936.3	cn_del	cn_del	-	-	P
RS1850267FFP	TMPRSS2	fusion	Intron5_Intron6	TMPRSS2-ETV1	0.58%	1371	-	21:42857025_7:14009946	21:42857025_7:14009946	2;0;5;5	0;0;0;1	-	-	NM_001135099.1	TMPRSS2-ETV1(T5:E7)	-	-	-	-
RS1850267FFP	ANKRD11	missense_variant	10	p.L1456P	79.50%	1356	0.000811782	16	89348583	A	G	rs766655310	-	NM_001256182.1	NM_001256182.1(ANKRD11):c.4367T>C(p.Leu1456Pro)	c.4367T>C	p.Leu1456Pro	p.L1456P	VUS
RS1850267FFP	SPTA1	frameshift_variant	2	p.E40fs	29.66%	3264	0	1	158655041	GCTCC	GAAACT	-	-	NM_003126.2	NM_003126.2(SPTA1):c.117_120delinsAGTTT(p.Glu40fs)	c.117_120delinsAGTTT	p.Glu40fs	p.E40fs	LP
RS1850267FFP	KMT2C	missense_variant	32	p.R1558L	14.98%	1509	0	7	151884920	C	A	-	-	NM_170606.2	NM_170606.2(KMT2C):c.4673G>T(p.Arg1558Leu)	c.4673G>T	p.Arg1558Leu	p.R1558L	VUS
RS1850267FFP	KMT2C	splice_region_variant	38	c.7443-6_7443-5insTA	80.17%	116	0	7	151875100	T	TTA	-	-	NM_170606.2	NM_170606.2(KMT2C):c.7443-6_7443-5insTA	c.7443-6_7443-5insTA	-	-	VUS
RS1850267FFP	TP53	splice_donor_variant	7	c.782+1G>A	63.09%	1211	0	17	7577498	C	T	-	COSM3717631,COSM395657,COSM3717630,COSM98255,COSM395658,COSM43571,COSM98254	NM_000546.5	NM_000546.5(TP53):c.782+1G>A	c.782+1G>A	-	-	LP
RS1850267FFP	SOX2	missense_variant	1	p.T232N	33.62%	13844	0.0004	3	181430843	C	A	rs766630697	-	NM_003106.3	NM_003106.3(SOX2):c.695C>A(p.Thr232Asn)	c.695C>A	p.Thr232Asn	p.T232N	VUS
RS1850273FFP	KRAS	cn_amp	-	cn_amp	3.06	0.113;2;11,11	-	12p12.1	12p12.1	3	1	-	-	NM_033360.3	cn_amp	cn_amp	-	-	VUS
RS1850273FFP	MAP2K4	cn_del	-	cn_del	0.82	NA;0;NA	-	17p12	17p12	12	11	-	-	NM_001281435.1	cn_del	cn_del	-	-	P
RS1850273FFP	AKT2	cn_amp	-	cn_amp	4.24	0.386;1;39	-	19q13.2	19q13.2	13	13	-	-	NM_001626.5	cn_amp	cn_amp	-	-	VUS
RS1850273FFP	AXL	cn_amp	-	cn_amp	4.42	0.311;1;31	-	19q13.2	19q13.2	20	19	-	-	NM_021913.4	cn_amp	cn_amp	-	-	VUS
RS1850273FFP	MYC	fusion	intergenic_Exon2	CCDC91-MYC	7.73%	4944	-	12:28783334_8:128750750	12:28783334_8:128750750	7;14;6;4	7;9;3;1	-	-	NM_002467.4	CCDC91-MYC(Cintergenic:M3)	-	-	-	-
RS1850273FFP	TP53	missense_variant	5	p.R175H	50.94%	3999	8.236e-06	17	7578406	C	T	rs28934578	COSM99914,COSM99022,COSM99024,COSM10648,COSM1640851,COSM99023,COSM3355994	NM_000546.5	NM_000546.5(TP53):c.524G>A(p.Arg175His)	c.524G>A	p.Arg175His	p.R175H	LP
RS1850273FFP	ALK	missense_variant	25	p.P1262S	21.00%	1143	0.0001	2	29432704	G	A	rs774360880	-	NM_004304.4	NM_004304.4(ALK):c.3784C>T(p.Pro1262Ser)	c.3784C>T	p.Pro1262Ser	p.P1262S	VUS
RS1850273FFP	AR	missense_variant	7	p.F827L	51.50%	1503	0.000231621	X	66942700	C	A	rs200801099	COSM3094437,COSM5826566,COSM3094438	NM_000044.3	NM_000044.3(AR):c.2481C>A(p.Phe827Leu)	c.2481C>A	p.Phe827Leu	p.F827L	VUS
RS1850273FFP	RBM10	missense_variant	9	p.G315C	25.45%	2000	0	X	47038741	G	T	-	-	NM_001204468.1	NM_001204468.1(RBM10):c.943G>T(p.Gly315Cys)	c.943G>T	p.Gly315Cys	p.G315C	VUS
RS1850273FFP	KMT2A	missense_variant	27	p.E2566K	69.77%	4227	3.295e-05	11	118374303	G	A	rs781986487	-	NM_001197104.1	NM_001197104.1(KMT2A):c.7696G>A(p.Glu2566Lys)	c.7696G>A	p.Glu2566Lys	p.E2566K	VUS
RS1850273FFP	KMT2D	missense_variant	34	p.Q3360H	31.80%	2654	4.06802e-06	12	49431059	C	G	-	-	NM_003482.3	NM_003482.3(KMT2D):c.10080G>C(p.Gln3360His)	c.10080G>C	p.Gln3360His	p.Q3360H	VUS
RS1850273FFP	DICER1	missense_variant	23	p.L1659V	13.80%	2608	0	14	95562282	G	C	-	-	NM_177438.2	NM_177438.2(DICER1):c.4975C>G(p.Leu1659Val)	c.4975C>G	p.Leu1659Val	p.L1659V	VUS
RS1850273FFP	BRCA1	missense_variant	12	p.Q1408P	66.05%	1835	0	17	41234555	T	G	-	-	NM_007294.3	NM_007294.3(BRCA1):c.4223A>C(p.Gln1408Pro)	c.4223A>C	p.Gln1408Pro	p.Q1408P	VUS
RS1850273FFP	MSH6	missense_variant	4	p.S275T	18.50%	3416	0.000115969	2	48025946	G	C	rs774586054	-	NM_000179.2	NM_000179.2(MSH6):c.824G>C(p.Ser275Thr)	c.824G>C	p.Ser275Thr	p.S275T	VUS
RS1850273FFP	TOP1	missense_variant	4	p.S57Y	14.11%	1063	0	20	39704825	C	A	-	-	NM_003286.2	NM_003286.2(TOP1):c.170C>A(p.Ser57Tyr)	c.170C>A	p.Ser57Tyr	p.S57Y	VUS
RS1850273FFP	WRN	missense_variant	24	p.L943M	73.51%	721	0.000617284	8	30989882	T	A	-	-	NM_000553.4	NM_000553.4(WRN):c.2827T>A(p.Leu943Met)	c.2827T>A	p.Leu943Met	p.L943M	LB
RS1850273FFP	PRKDC	missense_variant	18	p.F641Y	15.56%	2391	0	8	48842543	A	T	-	-	NM_006904.6	NM_006904.6(PRKDC):c.1922T>A(p.Phe641Tyr)	c.1922T>A	p.Phe641Tyr	p.F641Y	VUS
RS1850273FFP	PLCG2	splice_region_variant	21	c.2236-5dup	3.34%	1283	0.0002649	16	81954789	C	CT	rs577381463	-	NM_002661.4	NM_002661.4(PLCG2):c.2236-5dup	c.2236-5dup	-	-	VUS
RS1850674FFP	EMSY	cn_amp	-	cn_amp	3.4	0.277;2;26,29	-	11q13.5	11q13.5	20	20	-	-	NM_001300942.1	cn_amp	cn_amp	-	-	VUS
RS1850674FFP	PAK1	cn_amp	-	cn_amp	3.83	NA;0;NA	-	11q13.5	11q13.5	5	5	-	-	NM_001128620.1	cn_amp	cn_amp	-	-	VUS
RS1850674FFP	EPCAM	cn_amp	-	cn_amp	4.26	NA;0;NA	-	2p21	2p21	1	1	-	-	NM_002354.2	cn_amp	cn_amp	-	-	VUS
RS1850674FFP	CCND1	cn_amp	-	cn_amp	3.98	NA;0;NA	-	11q13.3	11q13.3	10	10	-	-	NM_053056.2	cn_amp	cn_amp	-	-	VUS
RS1850674FFP	FGF19	cn_amp	-	cn_amp	4.21	0.311;3;31,31,31	-	11q13.3	11q13.3	8	8	-	-	NM_005117.2	cn_amp	cn_amp	-	-	VUS
RS1850674FFP	FGF3	cn_amp	-	cn_amp	5.01	0.279;5;25,25,27,31,31	-	11q13.3	11q13.3	9	8	-	-	NM_005247.2	cn_amp	cn_amp	-	-	VUS
RS1850674FFP	MSH6	cn_amp	-	cn_amp	4.05	0.243;15;11,11,17,17,23,23,24,24,26,27,27,30,30,38,38	-	2p16.3	2p16.3	10	10	-	-	NM_000179.2	cn_amp	cn_amp	-	-	VUS
RS1850674FFP	MSH2	cn_amp	-	cn_amp	4.49	0.174;3;14,17,21	-	2p21	2p21	16	16	-	-	NM_000251.2	cn_amp	cn_amp	-	-	VUS
RS1850674FFP	ALK	fusion	Intron2_Intron26	VCL-ALK	2.00%	-	-	10:75815931_2:29420609	10:75815931_2:29420609	1;3;8;14	0;1;0;2	-	-	NM_004304.4	VCL-ALK(V2:A27)	-	-	-	-
RS1850674FFP	TP53	missense_variant	5	p.Y163C	51.99%	4451	0	17	7578442	T	C	rs148924904	COSM129852,COSM3388214,COSM129855,COSM10808,COSM129854,COSM1649381,COSM129853	NM_000546.5	NM_000546.5(TP53):c.488A>G(p.Tyr163Cys)	c.488A>G	p.Tyr163Cys	p.Y163C	LP
RS1850674FFP	HGF	missense_variant	17	p.H633R	47.10%	2055	0.0001	7	81334818	T	C	rs746110664	-	NM_000601.5	NM_000601.5(HGF):c.1898A>G(p.His633Arg)	c.1898A>G	p.His633Arg	p.H633R	VUS
RS1850674FFP	MYCN	missense_variant	3	p.S341N	9.93%	5239	0.0001538	2	16085846	G	A	rs144648016	-	NM_001293228.1	NM_001293228.1(MYCN):c.1022G>A(p.Ser341Asn)	c.1022G>A	p.Ser341Asn	p.S341N	VUS
RS1850674FFP	MLH3	missense_variant	2	p.F491V	46.65%	4144	0	14	75514888	A	C	-	-	NM_001040108.1	NM_001040108.1(MLH3):c.1471T>G(p.Phe491Val)	c.1471T>G	p.Phe491Val	p.F491V	VUS
RS1850674FFP	NF1	frameshift_variant	27	p.R1207fs	55.06%	2423	0	17	29560143	GAT	G	-	-	NM_000267.3	NM_000267.3(NF1):c.3621_3622del(p.Arg1207fs)	c.3621_3622del	p.Arg1207fs	p.R1207fs	LP
RS1850674FFP	HNF1B	missense_variant	6	p.H425R	77.01%	1657	0	17	36064989	T	C	-	-	NM_000458.3	NM_000458.3(HNF1B):c.1274A>G(p.His425Arg)	c.1274A>G	p.His425Arg	p.H425R	VUS
RS1850674FFP	ASXL1	missense_variant	12	p.A1327T	32.18%	4034	0	20	31024494	G	A	-	-	NM_015338.5	NM_015338.5(ASXL1):c.3979G>A(p.Ala1327Thr)	c.3979G>A	p.Ala1327Thr	p.A1327T	LB
RS1850674FFP	PDGFRB	missense_variant	9	p.R435C	45.39%	2939	0.000116809	5	149510166	G	A	rs747109578	COSM94956	NM_002609.3	NM_002609.3(PDGFRB):c.1303C>T(p.Arg435Cys)	c.1303C>T	p.Arg435Cys	p.R435C	VUS
RS1850674FFP	FGFR4	missense_variant	7	p.H247Q	30.65%	2509	0	5	176519335	C	G	-	-	NM_002011.4	NM_002011.4(FGFR4):c.741C>G(p.His247Gln)	c.741C>G	p.His247Gln	p.H247Q	VUS
RS1850674FFP	PTK2	splice_region_variant	4	c.428+3A>G	33.02%	4603	0	8	141889567	T	C	-	-	NM_005607.4	NM_005607.4(PTK2):c.428+3A>G	c.428+3A>G	-	-	VUS
RS1850674FFP	PAX5	missense_variant	10	p.A376T	35.94%	1330	8.312e-05	9	36840607	C	T	rs528158465	-	NM_016734.2	NM_016734.2(PAX5):c.1126G>A(p.Ala376Thr)	c.1126G>A	p.Ala376Thr	p.A376T	VUS
RS1850674FFP	VHL	missense_variant	3	p.R205H	41.19%	2595	0.00123457	3	10191621	G	A	rs777130107	COSM1232270	NM_000551.3	NM_000551.3(VHL):c.614G>A(p.Arg205His)	c.614G>A	p.Arg205His	p.R205H	VUS
RS1850674FFP	IRF2	splice_region_variant	3	c.88-7_88-4del	5.75%	173	0	4	185340725	GAAAA	G	-	-	NM_002199.3	NM_002199.3(IRF2):c.88-7_88-4del	c.88-7_88-4del	-	-	VUS
RS1850674FFP	GLI1	missense_variant	8	p.R265W	41.11%	2374	0.000199681	12	57860053	C	T	rs200444628	-	NM_005269.2	NM_005269.2(GLI1):c.793C>T(p.Arg265Trp)	c.793C>T	p.Arg265Trp	p.R265W	VUS
RS19003530FFP	KRAS	cn_amp	-	cn_amp	6.92	NA;0;NA	-	12p12.1	12p12.1	3	1	-	-	NM_033360.3	cn_amp	cn_amp	-	-	VUS
RS19003530FFP	SOX2	cn_amp	-	cn_amp	4.02	NA;0;NA	-	3q26.33	3q26.33	1	1	-	-	NM_003106.3	cn_amp	cn_amp	-	-	VUS
RS19003530FFP	DNMT3A	cn_amp	-	cn_amp	3.97	NA;0;NA	-	2p23.3	2p23.3	23	21	-	-	NM_022552.4	cn_amp	cn_amp	-	-	VUS
RS19003530FFP	MDM2	cn_amp	-	cn_amp	8.71	0.117;2;11,12	-	12q15	12q15	11	8	-	-	NM_002392.5	cn_amp	cn_amp	-	-	VUS
RS19003530FFP	JAK3	cn_amp	-	cn_amp	3.78	0.181;4;14,17,19,23	-	19p13.11	19p13.11	21	19	-	-	NM_000215.3	cn_amp	cn_amp	-	-	VUS
RS19003530FFP	ASXL2	cn_amp	-	cn_amp	3.24	NA;0;NA	-	2p23.3	2p23.3	6	5	-	-	NM_018263.4	cn_amp	cn_amp	-	-	VUS
RS19003530FFP	MAP3K13	cn_amp	-	cn_amp	3.5	NA;0;NA	-	3q27.2	3q27.2	11	11	-	-	NM_001242314.1	cn_amp	cn_amp	-	-	VUS
RS19003530FFP	BCL6	cn_amp	-	cn_amp	3.87	0.204;4;20,20,20,20	-	3q27.3	3q27.3	8	8	-	-	NM_001130845.1	cn_amp	cn_amp	-	-	VUS
RS19003530FFP	TP63	cn_amp	-	cn_amp	3.48	0.164;2;16,17	-	3q28	3q28	16	14	-	-	NM_003722.4	cn_amp	cn_amp	-	-	VUS
RS19003530FFP	MYCN	cn_amp	-	cn_amp	4.29	NA;0;NA	-	2p24.3	2p24.3	3	2	-	-	NM_001293228.1	cn_amp	cn_amp	-	-	VUS
RS19003530FFP	VEGFB	frameshift_variant	5	p.K129fs	21.33%	994	0.0002	11	64004662	TA	T	rs772425600	COSM4334225,COSM273453	NM_003377.4	NM_003377.4(VEGFB):c.386del(p.Lys129fs)	c.386del	p.Lys129fs	p.K129fs	VUS
RS19003530FFP	BRCA2	missense_variant	26	p.L3216P	14.63%	834	3.22831e-05	13	32971180	T	C	rs431825377	-	NM_000059.3	NM_000059.3(BRCA2):c.9647T>C(p.Leu3216Pro)	c.9647T>C	p.Leu3216Pro	p.L3216P	LB
RS19003530FFP	FANCA	splice_region_variant	14	c.1359+5G>A	14.46%	1639	0	16	89857806	C	T	-	-	NM_000135.2	NM_000135.2(FANCA):c.1359+5G>A	c.1359+5G>A	-	-	VUS
RS19003530FFP	TP53	stop_gained	6	p.R213*	49.35%	1684	8.236e-06	17	7578212	G	A	rs397516436	COSM99616,COSM99617,COSM1638393,COSM99618,COSM10654,COSM99615,COSM3378350	NM_000546.5	NM_000546.5(TP53):c.637C>T(p.Arg213*)	c.637C>T	p.Arg213*	p.R213*	P
RS19013421FFP	TP53	missense_variant	7	p.S241F	66.76%	1790	4.06088e-06	17	7577559	G	A	rs28934573	COSM214171,COSM1649402,COSM214172,COSM10812,COSM3522695,COSM214170	NM_000546.5	NM_000546.5(TP53):c.722C>T(p.Ser241Phe)	c.722C>T	p.Ser241Phe	p.S241F	LP
RS19013421FFP	NF1	disruptive_inframe_deletion	27	p.A1226_V1230del	28.95%	190	0	17	29560196	ATGGCTCTGGCCAATG	A	-	-	NM_000267.3	NM_000267.3(NF1):c.3677_3691del(p.Ala1226_Val1230del)	c.3677_3691del	p.Ala1226_Val1230del	p.A1226_V1230del	VUS
RS19013421FFP	BCOR	missense_variant	12	p.M1535I	44.98%	1016	0	X	39914655	C	G	-	-	NM_001123383.1	NM_001123383.1(BCOR):c.4605G>C(p.Met1535Ile)	c.4605G>C	p.Met1535Ile	p.M1535I	VUS
RS19044339FFP	KRAS	cn_amp	-	cn_amp	4	0.446;2;45,45	-	12p12.1	12p12.1	3	1	-	-	NM_033360.3	cn_amp	cn_amp	-	-	VUS
RS19044339FFP	SOX2	cn_amp	-	cn_amp	4.9	NA;0;NA	-	3q26.33	3q26.33	1	1	-	-	NM_003106.3	cn_amp	cn_amp	-	-	VUS
RS19044339FFP	ERG	cn_amp	-	cn_amp	3.8	0.33;2;32,34	-	21q22.2	21q22.2	11	10	-	-	NM_001136154.1	cn_amp	cn_amp	-	-	VUS
RS19044339FFP	U2AF1	cn_amp	-	cn_amp	4.1	NA;0;NA	-	21q22.3	21q22.3	8	5	-	-	NM_001025203.1	cn_amp	cn_amp	-	-	VUS
RS19044339FFP	TMPRSS2	cn_amp	-	cn_amp	4.7	0.277;62;12,18,34,34,35,...	-	21q22.3	21q22.3	33	19	-	-	NM_001135099.1	cn_amp	cn_amp	-	-	VUS
RS19044339FFP	PIK3C2G	cn_amp	-	cn_amp	3.9	0.42;2;41,43	-	12p12.3	12p12.3	27	25	-	-	NM_001288772.1	cn_amp	cn_amp	-	-	VUS
RS19044339FFP	MAP3K13	cn_amp	-	cn_amp	3.7	0.301;2;28,33	-	3q27.2	3q27.2	11	11	-	-	NM_001242314.1	cn_amp	cn_amp	-	-	VUS
RS19044339FFP	BCL6	cn_amp	-	cn_amp	3.6	NA;0;NA	-	3q27.3	3q27.3	8	8	-	-	NM_001130845.1	cn_amp	cn_amp	-	-	VUS
RS19044339FFP	PIK3CA	cn_amp	-	cn_amp	4.4	0.327;1;33	-	3q26.32	3q26.32	2	2	-	-	NM_006218.3	cn_amp	cn_amp	-	-	VUS
RS19044339FFP	MAP2K4	missense_variant	8	p.S262I	68.49%	733	0	17	12016616	G	T	-	COSM1479236	NM_001281435.1	NM_001281435.1(MAP2K4):c.785G>T(p.Ser262Ile)	c.785G>T	p.Ser262Ile	p.S262I	VUS
RS19044339FFP	TP53	frameshift_variant	4	p.P82fs	67.37%	1226	0	17	7579442	GGT	G	-	-	NM_000546.5	NM_000546.5(TP53):c.243_244del(p.Pro82fs)	c.243_244del	p.Pro82fs	p.P82fs	LP
RS19044339FFP	PIK3R1	splice_region_variant	15	c.1985+3A>C	72.22%	853	0	5	67592172	A	C	-	-	NM_181523.2	NM_181523.2(PIK3R1):c.1985+3A>C	c.1985+3A>C	-	-	VUS
RS19044339FFP	CARD11	missense_variant	13	p.S558I	23.16%	2832	0	7	2968313	C	A	-	-	NM_032415.5	NM_032415.5(CARD11):c.1673G>T(p.Ser558Ile)	c.1673G>T	p.Ser558Ile	p.S558I	VUS
RS19063412FFP	KRAS	missense_variant	2	p.G12D	30.07%	2547	1.647e-05	12	25398284	C	T	rs121913529	COSM521,COSM1135366	NM_033360.3	NM_033360.3(KRAS):c.35G>A(p.Gly12Asp)	c.35G>A	p.Gly12Asp	p.G12D	P
RS19063412FFP	SPOP	missense_variant	5	p.E47K	12.04%	1587	0	17	47699369	C	T	-	COSM88679	NM_001007226.1	NM_001007226.1(SPOP):c.139G>A(p.Glu47Lys)	c.139G>A	p.Glu47Lys	p.E47K	VUS
RS19064039FFP	RECQL4	cn_amp	-	cn_amp	5.4	0.237;21;24,24,24,25,25,...	-	8q24.3	8q24.3	3	3	-	-	NM_004260.3	cn_amp	cn_amp	-	-	VUS
RS19064039FFP	MAP2K4	cn_del	-	cn_del	0.3	NA;0;NA	-	17p12	17p12	12	11	-	-	NM_001281435.1	cn_del	cn_del	-	-	P
RS19064039FFP	PTEN	large_genomic_rearrangement	3-6	exon3-6cn_del	0.3	NA;0;NA	-	10q23.31	89685195-89712089(+)	9	4	-	-	NM_000314.6	NM_000314.6(PTEN):exon3-6cn_del	exon3-6cn_del	-	-	LP
RS19064039FFP	MYC	cn_amp	-	cn_amp	4.1	NA;0;NA	-	8q24.21	8q24.21	3	2	-	-	NM_002467.4	cn_amp	cn_amp	-	-	VUS
RS19064039FFP	TP53	stop_gained	5	p.S166*	73.27%	4986	0	17	7578433	G	C	-	COSM1649382,COSM369074,COSM369076,COSM369075,COSM4749461,COSM369077,COSM44467	NM_000546.5	NM_000546.5(TP53):c.497C>G(p.Ser166*)	c.497C>G	p.Ser166*	p.S166*	LP
RS19064039FFP	EPHA2	splice_acceptor_variant	3	c.154-1G>T	25.38%	2415	0	1	16475543	C	A	-	-	NM_004431.4	NM_004431.4(EPHA2):c.154-1G>T	c.154-1G>T	-	-	VUS
RS19064039FFP	ERCC3	missense_variant	13	p.A657T	68.16%	603	8.236e-06	2	128018899	C	T	rs766294536	-	NM_000122.1	NM_000122.1(ERCC3):c.1969G>A(p.Ala657Thr)	c.1969G>A	p.Ala657Thr	p.A657T	VUS
RS19064039FFP	PRKDC	missense_variant	1	p.C25R	10.84%	849	1.275e-05	8	48872614	A	G	rs774485933	-	NM_006904.6	NM_006904.6(PRKDC):c.73T>C(p.Cys25Arg)	c.73T>C	p.Cys25Arg	p.C25R	VUS
RS19064039FFP	ARAF	splice_region_variant	8	c.736+6_736+7delinsA	42.19%	2157	0	X	47426315	GTC	GA	-	-	NM_001256196.1	NM_001256196.1(ARAF):c.736+6_736+7delinsA	c.736+6_736+7delinsA	-	-	VUS
RS19071683FFP	RECQL4	cn_amp	-	cn_amp	3.9	0.358;4;34,34,38,38	-	8q24.3	8q24.3	3	3	-	-	NM_004260.3	cn_amp	cn_amp	-	-	VUS
RS19071683FFP	SOX17	cn_amp	-	cn_amp	3.6	NA;0;NA	-	8q11.23	8q11.23	2	2	-	-	NM_022454.3	cn_amp	cn_amp	-	-	VUS
RS19071683FFP	CDK12	large_genomic_rearrangement	11-14	exon11-14cn_amp	17.6	NA;0;NA	-	17q12	37676130-37687596(+)	14	4	-	-	NM_016507.3	NM_016507.3(CDK12):exon11-14cn_amp	exon11-14cn_amp	-	-	VUS
RS19071683FFP	NOTCH3	cn_amp	-	cn_amp	4.8	0.319;9;28,29,29,35,38,...	-	19p13.12	19p13.12	34	32	-	-	NM_000435.2	cn_amp	cn_amp	-	-	VUS
RS19071683FFP	BRD4	cn_amp	-	cn_amp	4.4	0.336;1;34	-	19p13.12	19p13.12	22	21	-	-	NM_058243.2	cn_amp	cn_amp	-	-	VUS
RS19071683FFP	ERBB2	cn_amp	-	cn_amp	20.3	NA;0;NA	-	17q12	17q12	18	18	-	-	NM_004448.3	cn_amp	cn_amp	-	-	VUS
RS19071683FFP	NOTCH3	fusion	intergenic_Exon30	NOTCH3(N29)-intergenic(CCDC124,KCNN1)	13.13%	3900	-	19:18056630_19:15276850	19:18056630_19:15276850	ID:2;SV_Type:TDUP;Orientation:RF;Putative_Impact:HIGH;Protein:False	Signal:BOTH;Counts:148|286	-	-	NM_000435.2	-	-	-	-	-
RS19071683FFP	TP53	frameshift_variant	5	p.A161fs	22.41%	12617	0	17	7578448	GC	G	-	COSM44230	NM_000546.5	NM_000546.5(TP53):c.481del(p.Ala161fs)	c.481del	p.Ala161fs	p.A161fs	LP
RS20002505FFP	PIK3CB	cn_amp	-	cn_amp	3.1	NA;0;NA	-	3q22.3	3q22.3	22	22	-	-	NM_006219.2	cn_amp	cn_amp	-	-	VUS
RS20002505FFP	ATR	cn_amp	-	cn_amp	3	NA;0;NA	-	3q23	3q23	47	47	-	-	NM_001184.3	cn_amp	cn_amp	-	-	VUS
RS20002505FFP	PREX2	cn_amp	-	cn_amp	6.1	0.192;6;17,17,19,21,22,...	-	8q13.2	8q13.2	28	28	-	-	NM_024870.3	cn_amp	cn_amp	-	-	VUS
RS20002505FFP	PRKDC	cn_amp	-	cn_amp	5.2	0.219;1;22	-	8q11.21	8q11.21	5	5	-	-	NM_006904.6	cn_amp	cn_amp	-	-	VUS
RS20002505FFP	LYN	cn_amp	-	cn_amp	5.9	0.169;2;15,18	-	8q12.1	8q12.1	12	12	-	-	NM_002350.3	cn_amp	cn_amp	-	-	VUS
RS20002505FFP	SOX17	cn_amp	-	cn_amp	5.2	NA;0;NA	-	8q11.23	8q11.23	2	2	-	-	NM_022454.3	cn_amp	cn_amp	-	-	VUS
RS20002505FFP	CCNE1	cn_amp	-	cn_amp	7.8	0.144;3;13,15,16	-	19q12	19q12	4	4	-	-	NM_001238.3	cn_amp	cn_amp	-	-	VUS
RS20002505FFP	TP63	cn_amp	-	cn_amp	3	0.352;2;33,38	-	3q28	3q28	16	14	-	-	NM_003722.4	cn_amp	cn_amp	-	-	VUS
RS20002505FFP	TP53	frameshift_variant	10	p.R333fs	58.69%	1588	0	17	7574029	CG	C	-	COSM69084,COSM437469	NM_000546.5	NM_000546.5(TP53):c.997del(p.Arg333fs)	c.997del	p.Arg333fs	p.R333fs	LP
RS20002505FFP	RB1	frameshift_variant	4	p.F162fs	62.38%	864	0	13	48919320	TC	T	-	-	NM_000321.2	NM_000321.2(RB1):c.486del(p.Phe162fs)	c.486del	p.Phe162fs	p.F162fs	LP
RS20003855FFP	RB1	large_genomic_rearrangement	1-11	exon1-11cn_del	0.4	NA;0;NA	-	13q14.2	48877914-48942775(+)	27	8	-	-	NM_000321.2	NM_000321.2(RB1):exon1-11cn_del	exon1-11cn_del	-	-	VUS
RS20003855FFP	MYC	cn_amp	-	cn_amp	3.7	0.217;2;22,22	-	8q24.21	8q24.21	3	2	-	-	NM_002467.4	cn_amp	cn_amp	-	-	VUS
RS20003855FFP	TP53	missense_variant	6	p.L194R	72.41%	2363	4.06065e-06	17	7578268	A	C	rs1057519998	COSM3403268,COSM44571,COSM117648,COSM117647,COSM117650,COSM117649,COSM1649391	NM_000546.5	NM_000546.5(TP53):c.581T>G(p.Leu194Arg)	c.581T>G	p.Leu194Arg	p.L194R	VUS
RS20005835FFP	IGF1R	cn_amp	-	cn_amp	3.5	-	-	15q26.3	15q26.3	21	16	-	-	NM_000875.4	cn_amp	cn_amp	-	-	VUS
RS20005835FFP	POLE	gene_fusion	Intron3_Exon46	RFC5-POLE	5.91%	2707	-	12	133202863	12:118457954_12:133202863	12:118457954_12:133202863	-	-	NM_006231.3	RFC5-POLE(R3:P45)	-	-	-	-
RS20005835FFP	ERBB4	splice_region_variant	27	c.3481+3A>T	3.96%	1060	0	2	212251575	T	A	-	-	NM_005235.2	NM_005235.2(ERBB4):c.3481+3A>T	c.3481+3A>T	-	-	VUS
RS20005835FFP	IKBKE	missense_variant	18	p.K586E	10.35%	3062	0	1	206665003	A	G	-	-	NM_014002.3	NM_014002.3(IKBKE):c.1756A>G(p.Lys586Glu)	c.1756A>G	p.Lys586Glu	p.K586E	VUS
RS20005835FFP	IKBKE	splice_donor_variant	20	c.2045+1G>C	23.50%	1549	0	1	206666712	G	C	-	-	NM_014002.3	NM_014002.3(IKBKE):c.2045+1G>C	c.2045+1G>C	-	-	-
RS20005835FFP	EPHA7	missense_variant	15	p.G852V	9.38%	1279	0	6	93956681	C	A	-	COSM122871	NM_004440.3	NM_004440.3(EPHA7):c.2555G>T(p.Gly852Val)	c.2555G>T	p.Gly852Val	p.G852V	VUS
RS20005835FFP	MET	missense_variant	9	p.P742T	14.74%	1058	0	7	116398634	C	A	-	-	NM_000245.3	NM_000245.3(MET):c.2224C>A(p.Pro742Thr)	c.2224C>A	p.Pro742Thr	p.P742T	-
RS20005835FFP	TP53	missense_variant	5	p.T155N	25.18%	7399	0	17	7578466	G	T	rs786202752	COSM213310,COSM11218,COSM3403277,COSM213313,COSM213311,COSM213312,COSM2152706	NM_000546.5	NM_000546.5(TP53):c.464C>A(p.Thr155Asn)	c.464C>A	p.Thr155Asn	p.T155N	VUS
RS20006774FFP	TERT	cn_amp	-	cn_amp	3.6	-	-	5p15.33	5p15.33	17	14	-	-	NM_198253.2	cn_amp	cn_amp	-	-	VUS
RS20006774FFP	SDHB	gene_fusion	intergenic_Exon7	intergenic(HAO2,HSD3B2)-SDHB	6.46%	2069	-	1	17349188	1:17349188_1:119950889	1:17349188_1:119950889	-	-	NM_003000.2	intergenic-SDHB(intergenic:S8)	-	-	-	-
RS20006774FFP	FAM13C	gene_fusion	Exon22_Intron6	NF1-FAM13C	7.84%	1117	-	17	29556916	17:29556916_10:61037804	17:29556916_10:61037804	-	-	NM_198215.3	NF1-FAM13C(N21:F6)	-	-	-	-
RS20006774FFP	BRCA1	frameshift_variant	10	p.T992fs	57.62%	1286	0	17	41244573	GT	G	-	-	NM_007294.3	NM_007294.3(BRCA1):c.2974del(p.Thr992fs)	c.2974del	p.Thr992fs	p.T992fs	-
RS20006774FFP	LRP1B	missense_variant	31	p.N1713S	45.72%	1144	0	2	141597631	T	C	-	-	NM_018557.2	NM_018557.2(LRP1B):c.5138A>G(p.Asn1713Ser)	c.5138A>G	p.Asn1713Ser	p.N1713S	VUS
RS20006774FFP	PTPRT	missense_variant	28	p.F1265I	40.21%	1450	0	20	40727171	A	T	-	-	NM_133170.3	NM_133170.3(PTPRT):c.3793T>A(p.Phe1265Ile)	c.3793T>A	p.Phe1265Ile	p.F1265I	-
RS20006774FFP	RUNX1	missense_variant	9	p.T361S	37.89%	1193	0	21	36164794	T	A	-	-	NM_001754.4	NM_001754.4(RUNX1):c.1081A>T(p.Thr361Ser)	c.1081A>T	p.Thr361Ser	p.T361S	-
RS20006774FFP	PIK3CB	missense_variant	2	p.N70K	40.78%	1405	0	3	138474783	G	T	-	-	NM_006219.2	NM_006219.2(PIK3CB):c.210C>A(p.Asn70Lys)	c.210C>A	p.Asn70Lys	p.N70K	-
RS20006774FFP	TP53	missense_variant	7	p.R249S	57.75%	1465	0	17	7577534	C	A	rs28934571	COSM131478,COSM1646861,COSM10817,COSM131479,COSM3717634	NM_000546.5	NM_000546.5(TP53):c.747G>T(p.Arg249Ser)	c.747G>T	p.Arg249Ser	p.R249S	VUS
RS20007056FFP	KRAS	missense_variant	2	p.G12C	42.06%	2197	0.0001	12	25398285	C	A	rs121913530	COSM516,COSM1140136	NM_033360.3	NM_033360.3(KRAS):c.34G>T(p.Gly12Cys)	c.34G>T	p.Gly12Cys	p.G12C	LP
RS20007056FFP	JAK1	missense_variant	10	p.A417V	25.25%	1628	8.262e-06	1	65325872	G	A	rs777303853	-	NM_001320923.1	NM_001320923.1(JAK1):c.1250C>T(p.Ala417Val)	c.1250C>T	p.Ala417Val	p.A417V	-
RS20007056FFP	TP53	splice_acceptor_variant	7	c.673-1G>T	35.09%	1328	0	17	7577609	C	A	rs878854073	COSM344603,COSM344605,COSM3787443,COSM1646848,COSM344604,COSM45135	NM_000546.5	NM_000546.5(TP53):c.673-1G>T	c.673-1G>T	-	-	P
RS20008943FFP	RECQL4	cn_amp	-	cn_amp	6.3	-	-	8q24.3	8q24.3	3	3	-	-	NM_004260.3	cn_amp	cn_amp	-	-	VUS
RS20008943FFP	PREX2	cn_amp	-	cn_amp	5.3	-	-	8q13.2	8q13.2	28	28	-	-	NM_024870.3	cn_amp	cn_amp	-	-	VUS
RS20008943FFP	NBN	cn_amp	-	cn_amp	5.1	-	-	8q21.3	8q21.3	16	15	-	-	NM_002485.4	cn_amp	cn_amp	-	-	VUS
RS20008943FFP	RUNX1T1	cn_amp	-	cn_amp	4.8	-	-	8q21.3	8q21.3	11	7	-	-	NM_001198679.1	cn_amp	cn_amp	-	-	VUS
RS20008943FFP	CSMD3	cn_amp	-	cn_amp	5	-	-	8q23.3	8q23.3	5	4	-	-	NM_198123.1	cn_amp	cn_amp	-	-	VUS
RS20008943FFP	PRKDC	cn_amp	-	cn_amp	4.9	-	-	8q11.21	8q11.21	5	5	-	-	NM_006904.6	cn_amp	cn_amp	-	-	VUS
RS20008943FFP	SDC4	cn_amp	-	cn_amp	3.8	-	-	20q13.12	20q13.12	11	11	-	-	NM_002999.3	cn_amp	cn_amp	-	-	VUS
RS20008943FFP	LYN	cn_amp	-	cn_amp	5.5	-	-	8q12.1	8q12.1	12	12	-	-	NM_002350.3	cn_amp	cn_amp	-	-	VUS
RS20008943FFP	SOX17	cn_amp	-	cn_amp	5.8	-	-	8q11.23	8q11.23	2	2	-	-	NM_022454.3	cn_amp	cn_amp	-	-	VUS
RS20008943FFP	PTPRT	cn_amp	-	cn_amp	3.7	-	-	20q12	20q12	29	26	-	-	NM_133170.3	cn_amp	cn_amp	-	-	VUS
RS20008943FFP	MYC	cn_amp	-	cn_amp	5.5	-	-	8q24.21	8q24.21	3	2	-	-	NM_002467.4	cn_amp	cn_amp	-	-	VUS
RS20008943FFP	SRC	cn_amp	-	cn_amp	3.9	-	-	20q11.23	20q11.23	11	11	-	-	NM_198291.2	cn_amp	cn_amp	-	-	VUS
RS20008943FFP	ARFRP1	cn_amp	-	cn_amp	4.5	-	-	20q13.33	20q13.33	8	8	-	-	NM_001267547.2	-	-	-	-	VUS
RS20008943FFP	ZNF217	cn_amp	-	cn_amp	9	-	-	20q13.2	20q13.2	7	6	-	-	NM_006526.2	-	-	-	-	VUS
RS20008943FFP	GATA2	missense_variant	4	p.T124M	42.56%	3327	3.23373e-05	3	128205070	G	A	-	COSM3427013	NM_001145661.1	NM_001145661.1(GATA2):c.371C>T(p.Thr124Met)	c.371C>T	p.Thr124Met	p.T124M	VUS
RS20008943FFP	ERBB2	missense_variant	26	p.D1105N	19.12%	2725	0	17	37883701	G	A	rs111611886	-	NM_004448.3	NM_004448.3(ERBB2):c.3313G>A(p.Asp1105Asn)	c.3313G>A	p.Asp1105Asn	p.D1105N	VUS
RS20008943FFP	HIST1H3I	missense_variant	1	p.G45S	36.22%	2921	0	6	27839961	C	T	-	-	NM_003533.2	NM_003533.2(HIST1H3I):c.133G>A(p.Gly45Ser)	c.133G>A	p.Gly45Ser	p.G45S	-
RS20008943FFP	AR	missense_variant	1	p.K318T	58.92%	1609	0	X	66765941	A	C	-	-	NM_000044.3	NM_000044.3(AR):c.953A>C(p.Lys318Thr)	c.953A>C	p.Lys318Thr	p.K318T	-
RS20011946FFP	NFKBIA	cn_amp	-	cn_amp	4.4	-	-	14q13.2	14q13.2	6	6	-	-	NM_020529.2	cn_amp	cn_amp	-	-	VUS
RS20011946FFP	RUNX1T1	missense_variant	10	p.A496V	29.72%	811	7.69e-05	8	92988171	G	A	rs377029087	COSM3902039,COSM3902040,COSM3902041	NM_001198679.1	NM_001198679.1(RUNX1T1):c.1487C>T(p.Ala496Val)	c.1487C>T	p.Ala496Val	p.A496V	VUS
RS20011946FFP	IDH2	missense_variant	7	p.N281Y	6.17%	3242	0	15	90630470	T	A	-	-	NM_002168.3	NM_002168.3(IDH2):c.841A>T(p.Asn281Tyr)	c.841A>T	p.Asn281Tyr	p.N281Y	VUS
RS20011946FFP	CDKN2A	missense_variant	2	p.G55D	9.40%	5191	0	9	21971194	C	T	-	COSM4188029,COSM4188030,COSM4188031,COSM4188028	NM_000077.4	NM_000077.4(CDKN2A):c.164G>A(p.Gly55Asp)	c.164G>A	p.Gly55Asp	p.G55D	LB
RS20017160FFP	NF1	large_genomic_rearrangement	Exon44_Exon48	exon44-48amp	83.65%	839	-	17	29676346	17:29676346_17:29665014	17:29676346_17:29665014	-	-	NM_000267.3	NF1(NM_000267.3):c.6642-29_7258+77dup	c.6642-29_7258+77dup	-	-	LP
RS20017160FFP	TP53	missense_variant	8	p.G266R	65.58%	2031	0	17	7577142	C	T	-	COSM10794,COSM1645293,COSM3388175,COSM1559475	NM_000546.5	NM_000546.5(TP53):c.796G>A(p.Gly266Arg)	c.796G>A	p.Gly266Arg	p.G266R	VUS
RS20017160FFP	CTNNB1	conservative_inframe_deletion	6	p.L294_Q302del	28.21%	1177	0	3	41267295	CTTGGCTATTACGACAGACTGCCTTCAA	C	-	-	NM_001904.3	NM_001904.3(CTNNB1):c.880_906del(p.Leu294_Gln302del)	c.880_906del	p.Leu294_Gln302del	p.L294_Q302del	VUS
RS20017160FFP	FGFR4	splice_acceptor_variant	15	c.1945-2A>G	57.39%	1685	0	5	176523286	A	G	-	-	NM_002011.4	NM_002011.4(FGFR4):c.1945-2A>G	c.1945-2A>G	-	-	VUS
RS20040159FFP	RECQL4	cn_amp	-	cn_amp	4.5	-	-	8q24.3	8q24.3	3	3	-	-	NM_004260.3	cn_amp	cn_amp	-	-	VUS
RS20040159FFP	CSMD3	cn_amp	-	cn_amp	3.7	-	-	8q23.3	8q23.3	5	4	-	-	NM_198123.1	cn_amp	cn_amp	-	-	VUS
RS20040159FFP	TERT	cn_amp	-	cn_amp	6.2	-	-	5p15.33	5p15.33	17	14	-	-	NM_198253.2	cn_amp	cn_amp	-	-	VUS
RS20040159FFP	MYC	cn_amp	-	cn_amp	3.7	-	-	8q24.21	8q24.21	3	2	-	-	NM_002467.4	cn_amp	cn_amp	-	-	VUS
RS20040159FFP	RICTOR	cn_amp	-	cn_amp	4.4	-	-	5p13.1	5p13.1	38	35	-	-	NM_001285439.1	cn_amp	cn_amp	-	-	VUS
RS20040159FFP	IL7R	cn_amp	-	cn_amp	5.1	-	-	5p13.2	5p13.2	8	8	-	-	NM_002185.3	cn_amp	cn_amp	-	-	VUS
RS20040159FFP	SDHA	cn_amp	-	cn_amp	5.5	-	-	5p15.33	5p15.33	15	14	-	-	NM_004168.3	cn_amp	cn_amp	-	-	VUS
RS20040159FFP	HIST1H3D	start_lost	2	p.M1?	59.06%	1473	0	6	26197477	A	G	-	-	NM_003530.4	NM_003530.4(HIST1H3D):c.2T>C(p.Met1?)	c.2T>C	p.Met1?	p.M1?	VUS
RS20040159FFP	FH	missense_variant	6	p.V293F	33.55%	2617	0	1	241669330	C	A	-	-	NM_000143.3	NM_000143.3(FH):c.877G>T(p.Val293Phe)	c.877G>T	p.Val293Phe	p.V293F	VUS
RS20040159FFP	FGF3	missense_variant	3	p.L124R	6.11%	2406	0	11	69625422	A	C	-	-	NM_005247.2	NM_005247.2(FGF3):c.371T>G(p.Leu124Arg)	c.371T>G	p.Leu124Arg	p.L124R	VUS
RS20040159FFP	MED12	missense_variant	5	p.G208V	58.69%	2198	0	X	70340890	G	T	-	-	NM_005120.2	NM_005120.2(MED12):c.623G>T(p.Gly208Val)	c.623G>T	p.Gly208Val	p.G208V	VUS
RS20040159FFP	KDR	conservative_inframe_deletion	21	p.E980del	4.42%	1356	0	4	55960999	TCTC	T	-	-	NM_002253.2	NM_002253.2(KDR):c.2938_2940del(p.Glu980del)	c.2938_2940del	p.Glu980del	p.E980del	VUS
RS20040159FFP	TP53	missense_variant	5	p.V173L	50.20%	4815	0	17	7578413	C	A	rs876660754	COSM3723936,COSM99638,COSM99639,COSM3723937,COSM43559,COSM99640,COSM99641	NM_000546.5	NM_000546.5(TP53):c.517G>T(p.Val173Leu)	c.517G>T	p.Val173Leu	p.V173L	P
RS20043537FFP	NSD1	cn_amp	-	cn_amp	3.9	-	-	5q35.2	5q35.2	22	19	-	-	NM_022455.4	cn_amp	cn_amp	-	-	VUS
RS20043537FFP	FLT4	cn_amp	-	cn_amp	3.9	-	-	5q35.3	5q35.3	28	23	-	-	NM_182925.4	cn_amp	cn_amp	-	-	VUS
RS20043537FFP	PMS2	cn_amp	-	cn_amp	3.8	-	-	7p22.1	7p22.1	15	11	-	-	NM_000535.6	cn_amp	cn_amp	-	-	VUS
RS20043537FFP	RAC1	cn_amp	-	cn_amp	3.8	-	-	7p22.1	7p22.1	7	6	-	-	NM_018890.3	cn_amp	cn_amp	-	-	VUS
RS20043537FFP	MYC	cn_amp	-	cn_amp	5.6	-	-	8q24.21	8q24.21	3	2	-	-	NM_002467.4	cn_amp	cn_amp	-	-	VUS
RS20043537FFP	NF1	frameshift_variant	42	p.T2133fs	59.98%	832	0	17	29664417	GACAGAGTTCTCAT	G	-	-	NM_000267.3	NM_000267.3(NF1):c.6397_6409del(p.Thr2133fs)	c.6397_6409del	p.Thr2133fs	p.T2133fs	LP
RS20043537FFP	TP53	missense_variant	8	p.P278A	52.41%	3408	0	17	7577106	G	C	rs17849781	COSM1646809,COSM99725,COSM10814,COSM3717626	NM_000546.5	NM_000546.5(TP53):c.832C>G(p.Pro278Ala)	c.832C>G	p.Pro278Ala	p.P278A	LP
RS20044449FFP	NF1	large_genomic_rearrangement	Intron13_Exon12	exon13amp	6.14%	1423	-	17	29533319	17:29543333_17:29533319	17:29543333_17:29533319	-	-	NM_000267.3	NF1(NM_000267.3):c.1322_1527+1730dup	c.1322_1527+1730dup	-	-	LP
RS20044449FFP	BRAF	gene_fusion	intergenic_Intron7	intergenic(SLC16A7,TAFA2)-BRAF	2.62%	2426	-	7	140497512	7:140497512_12:61853616	7:140497512_12:61853616	-	-	NM_004333.4	intergenic-BRAF(intergenic:B8)	-	-	-	VUS
RS20044449FFP	TP53	disruptive_inframe_deletion	8	p.N263_L265delinsK	20.42%	4074	0	17	7577143	CAGTAGA	C	-	-	NM_000546.5	NM_000546.5(TP53):c.789_794del(p.Asn263_Leu265delinsLys)	c.789_794del	p.Asn263_Leu265delinsLys	p.N263_L265delinsK	VUS
RS20044449FFP	NOTCH2	missense_variant	28	p.P1729S	3.27%	2355	0	1	120464887	G	A	-	COSM3738088	NM_024408.3	NM_024408.3(NOTCH2):c.5185C>T(p.Pro1729Ser)	c.5185C>T	p.Pro1729Ser	p.P1729S	VUS
RS20044449FFP	ARID1A	missense_variant	10	p.P989S	5.83%	1253	1.647e-05	1	27093034	C	T	rs775307425	-	NM_006015.4	NM_006015.4(ARID1A):c.2965C>T(p.Pro989Ser)	c.2965C>T	p.Pro989Ser	p.P989S	VUS
RS20044449FFP	FLT1	missense_variant	25	p.D1108E	4.24%	1037	7.69e-05	13	28891697	G	C	rs369434906	-	NM_002019.4	NM_002019.4(FLT1):c.3324C>G(p.Asp1108Glu)	c.3324C>G	p.Asp1108Glu	p.D1108E	VUS
RS20044449FFP	NF1	missense_variant	13	p.P481R	8.79%	1013	0	17	29541518	C	G	-	-	NM_000267.3	NM_000267.3(NF1):c.1442C>G(p.Pro481Arg)	c.1442C>G	p.Pro481Arg	p.P481R	VUS
RS20044449FFP	NF1	missense_variant	51	p.K2521R	7.68%	912	0	17	29683487	A	G	-	-	NM_000267.3	NM_000267.3(NF1):c.7562A>G(p.Lys2521Arg)	c.7562A>G	p.Lys2521Arg	p.K2521R	VUS
RS20044449FFP	NOTCH3	missense_variant	29	p.Q1749E	6.04%	1490	0	19	15278177	G	C	-	-	NM_000435.2	NM_000435.2(NOTCH3):c.5245C>G(p.Gln1749Glu)	c.5245C>G	p.Gln1749Glu	p.Q1749E	VUS
RS20044449FFP	PTPRS	missense_variant	11	p.R436Q	4.59%	2333	8.25e-06	19	5244175	C	T	rs759347088	-	NM_002850.3	NM_002850.3(PTPRS):c.1307G>A(p.Arg436Gln)	c.1307G>A	p.Arg436Gln	p.R436Q	VUS
RS20044449FFP	ZNF217	missense_variant	1	p.L92V	21.65%	2744	0	20	52199092	G	C	-	-	NM_006526.2	NM_006526.2(ZNF217):c.274C>G(p.Leu92Val)	c.274C>G	p.Leu92Val	p.L92V	VUS
RS20046780FFP	MYC	cn_amp	-	cn_amp	3.6	-	-	8q24.21	8q24.21	3	2	-	-	NM_002467.4	cn_amp	cn_amp	-	-	VUS
RS20046780FFP	KDM5A	cn_amp	-	cn_amp	3.7	-	-	12p13.33	12p13.33	28	28	-	-	NM_001042603.2	cn_amp	cn_amp	-	-	VUS
RS20046780FFP	RAD52	cn_amp	-	cn_amp	3.6	-	-	12p13.33	12p13.33	11	11	-	-	NM_001297419.1	cn_amp	cn_amp	-	-	VUS
RS20046780FFP	FGF23	cn_amp	-	cn_amp	3.6	-	-	12p13.32	12p13.32	-	-	-	-	NM_020638.2	-	-	-	-	VUS
RS20046780FFP	CDH1	large_genomic_rearrangement	Exon4_Exon15	exon4-15del	26.75%	1416	-	16	68867164	16:68841601_16:68867164	16:68841601_16:68867164	-	-	NM_004360.4	CDH1(NM_004360.5):c.388-725_2440-30del	c.388-725_2440-30del	-	-	LP
RS20046780FFP	HIST1H1C	missense_variant	1	p.V73M	10.11%	3137	8.236e-06	6	26056440	C	T	rs773914281	-	NM_005319.3	NM_005319.3(HIST1H1C):c.217G>A(p.Val73Met)	c.217G>A	p.Val73Met	p.V73M	VUS
RS20046780FFP	LRP1B	splice_region_variant	83	c.12641-3C>G	17.71%	909	0	2	141072671	G	C	-	-	NM_018557.2	NM_018557.2(LRP1B):c.12641-3C>G	c.12641-3C>G	-	-	VUS
RS20046780FFP	RET	missense_variant	18	p.D993N	21.48%	1704	0	10	43620368	G	A	-	-	NM_020975.4	NM_020975.4(RET):c.2977G>A(p.Asp993Asn)	c.2977G>A	p.Asp993Asn	p.D993N	VUS
RS20046780FFP	FOXO1	frameshift_variant	2	p.C404fs	2.05%	3952	0	13	41134388	AACTGGTGTTTGGTGGCGCAAACGAGTAGC	A	-	-	NM_002015.3	NM_002015.3(FOXO1):c.1211_1239del(p.Cys404fs)	c.1211_1239del	p.Cys404fs	p.C404fs	VUS
RS20046780FFP	SETD2	missense_variant	15	p.T2101A	16.52%	914	0	3	47098973	T	C	-	-	NM_014159.6	NM_014159.6(SETD2):c.6301A>G(p.Thr2101Ala)	c.6301A>G	p.Thr2101Ala	p.T2101A	LB
RS20046780FFP	HGF	frameshift_variant	10	p.L410fs	19.88%	1479	0	7	81350093	TGAACATGTTA	T	-	-	NM_000601.5	NM_000601.5(HGF):c.1229_1238del(p.Leu410fs)	c.1229_1238del	p.Leu410fs	p.L410fs	LP
RS20046780FFP	TP53	missense_variant	7	p.R248Q	29.32%	2684	0.0002	17	7577538	C	T	rs11540652	COSM99021,COSM99020,COSM1640830,COSM3356964,COSM10662,COSM99602	NM_000546.5	NM_000546.5(TP53):c.743G>A(p.Arg248Gln)	c.743G>A	p.Arg248Gln	p.R248Q	LP
RS20047771FFP	RB1	large_genomic_rearrangement	3-4	exon3-4cn_del	0.4	-	-	13q14.2	48916684-48919383(+)	26	2	-	-	NM_000321.2	NM_000321.2(RB1):exon3-4cn_del	exon3-4cn_del	-	-	LP
RS20047771FFP	PTEN	cn_del	-	cn_del	0.4	-	-	10q23.31	10q23.31	10	3	-	-	NM_000314.6	cn_del	cn_del	-	-	VUS
RS20047771FFP	BTK	cn_amp	-	cn_amp	5.2	-	-	X	Xq22.1	9	9	-	-	NM_000061.2	cn_amp	cn_amp	-	-	VUS
RS20047771FFP	TP53	splice_donor_variant	9	c.993+2T>A	71.27%	1782	0	17	7576851	A	T	-	COSM707067,COSM4859709,COSM707068,COSM1646824	NM_000546.5	NM_000546.5(TP53):c.993+2T>A	c.993+2T>A	-	-	LP
RS20047771FFP	ERRFI1	missense_variant	4	p.S311T	28.93%	4490	0	1	8073727	C	G	-	-	NM_018948.3	NM_018948.3(ERRFI1):c.932G>C(p.Ser311Thr)	c.932G>C	p.Ser311Thr	p.S311T	VUS
RS20047771FFP	ERCC3	missense_variant	5	p.E178K	40.83%	987	0	2	128047390	C	T	-	-	NM_000122.1	NM_000122.1(ERCC3):c.532G>A(p.Glu178Lys)	c.532G>A	p.Glu178Lys	p.E178K	VUS
RS20054151FFP	SOX2	cn_amp	-	cn_amp	4.6	-	-	3q26.33	3q26.33	1	1	-	-	NM_003106.3	cn_amp	cn_amp	-	-	VUS
RS20054151FFP	IKBKE	cn_amp	-	cn_amp	4	-	-	1q32.1	1q32.1	19	18	-	-	NM_014002.3	cn_amp	cn_amp	-	-	VUS
RS20054151FFP	NOTCH4	cn_amp	-	cn_amp	4	-	-	6p21.32	6p21.32	7	7	-	-	NM_004557.3	cn_amp	cn_amp	-	-	VUS
RS20054151FFP	AURKB	cn_amp	-	cn_amp	4.1	-	-	17p13.1	17p13.1	8	8	-	-	NM_001284526.1	cn_amp	cn_amp	-	-	VUS
RS20054151FFP	TP63	cn_amp	-	cn_amp	4.6	-	-	3q28	3q28	16	14	-	-	NM_003722.4	cn_amp	cn_amp	-	-	VUS
RS20054151FFP	FGF12	cn_amp	-	cn_amp	4.1	-	-	3q28	3q28	5	3	-	-	NM_021032.4	cn_amp	cn_amp	-	-	VUS
RS20054151FFP	AXIN2	gene_fusion	Intron2_Intron10	CASC17-AXIN2	47.53%	120	-	17	63528748	17:63528748_17:69166492	17:63528748_17:69166492	-	-	NM_004655.3	CASC17-AXIN2(C3'UTR:A11)	-	-	-	LP
RS20054151FFP	EP300	missense_variant	16	p.P1039L	31.04%	1582	6.46663e-05	22	41548328	C	T	rs770254783	-	NM_001429.3	NM_001429.3(EP300):c.3116C>T(p.Pro1039Leu)	c.3116C>T	p.Pro1039Leu	p.P1039L	VUS
RS20054151FFP	PGR	missense_variant	1	p.P163S	38.64%	1672	0	11	100999315	G	A	-	-	NM_000926.4	NM_000926.4(PGR):c.487C>T(p.Pro163Ser)	c.487C>T	p.Pro163Ser	p.P163S	VUS
RS20054151FFP	PRKDC	stop_gained	37	p.E1606*	35.58%	1956	0	8	48794616	C	A	-	-	NM_006904.6	NM_006904.6(PRKDC):c.4816G>T(p.Glu1606*)	c.4816G>T	p.Glu1606*	p.E1606*	LP
RS20054151FFP	TP53	missense_variant	5	p.Y126S	78.95%	4512	0	17	7578553	T	G	-	COSM44142,COSM1610876,COSM1610877,COSM4780867,COSM1610875,COSM4780866	NM_000546.5	NM_000546.5(TP53):c.377A>C(p.Tyr126Ser)	c.377A>C	p.Tyr126Ser	p.Y126S	VUS
RS20062017FFP	SOX2	cn_amp	-	cn_amp	4.4	-	-	3q26.33	3q26.33	1	1	-	-	NM_003106.3	cn_amp	cn_amp	-	-	VUS
RS20062017FFP	DCUN1D1	cn_amp	-	cn_amp	4.3	-	-	3q26.33	3q26.33	1	1	-	-	NM_020640.3	cn_amp	cn_amp	-	-	VUS
RS20062017FFP	MYD88	cn_amp	-	cn_amp	3.7	-	-	3p22.2	3p22.2	5	5	-	-	NM_002468.4	cn_amp	cn_amp	-	-	VUS
RS20062017FFP	MDC1	cn_amp	-	cn_amp	4.4	-	-	6p21.33	6p21.33	6	6	-	-	NM_014641.2	cn_amp	cn_amp	-	-	VUS
RS20062017FFP	BAP1	cn_amp	-	cn_amp	4.5	-	-	3p21.1	3p21.1	14	8	-	-	NM_004656.3	cn_amp	cn_amp	-	-	VUS
RS20062017FFP	PBRM1	cn_amp	-	cn_amp	4.2	-	-	3p21.1	3p21.1	28	15	-	-	NM_018313.4	cn_amp	cn_amp	-	-	VUS
RS20062017FFP	PARP3	cn_amp	-	cn_amp	5	-	-	3p21.2	3p21.2	6	5	-	-	NM_001003931.3	cn_amp	cn_amp	-	-	VUS
RS20062017FFP	MST1R	cn_amp	-	cn_amp	4.2	-	-	3p21.31	3p21.31	11	8	-	-	NM_002447.3	cn_amp	cn_amp	-	-	VUS
RS20062017FFP	CDKN1A	cn_amp	-	cn_amp	4	-	-	6p21.2	6p21.2	2	2	-	-	NM_001291549.1	cn_amp	cn_amp	-	-	VUS
RS20062017FFP	PIM1	cn_amp	-	cn_amp	4.2	-	-	6p21.2	6p21.2	4	4	-	-	NM_001243186.1	cn_amp	cn_amp	-	-	VUS
RS20062017FFP	FANCE	cn_amp	-	cn_amp	4	-	-	6p21.31	6p21.31	10	8	-	-	NM_021922.2	cn_amp	cn_amp	-	-	VUS
RS20062017FFP	NOTCH4	cn_amp	-	cn_amp	4.5	-	-	6p21.32	6p21.32	7	7	-	-	NM_004557.3	cn_amp	cn_amp	-	-	VUS
RS20062017FFP	BCL6	cn_amp	-	cn_amp	5	-	-	3q27.3	3q27.3	8	8	-	-	NM_001130845.1	cn_amp	cn_amp	-	-	VUS
RS20062017FFP	TP63	cn_amp	-	cn_amp	4.5	-	-	3q28	3q28	16	14	-	-	NM_003722.4	cn_amp	cn_amp	-	-	VUS
RS20062017FFP	FGF12	cn_amp	-	cn_amp	4.1	-	-	3q28	3q28	5	3	-	-	NM_021032.4	cn_amp	cn_amp	-	-	VUS
RS20062017FFP	PIK3CA	cn_amp	-	cn_amp	4.3	-	-	3q26.32	3q26.32	2	2	-	-	NM_006218.3	cn_amp	cn_amp	-	-	VUS
RS20062017FFP	RHOA	cn_amp	-	cn_amp	4.4	-	-	3p21.31	3p21.31	17	12	-	-	NM_001664.3	cn_amp	-	-	-	VUS
RS20062017FFP	EPHA2	gene_fusion	intergenic_Intron14	intergenic(LINC01995,ATP11B)-EPHA2	25.87%	547	-	1	16456977	1:16456977_3:182318476	1:16456977_3:182318476	-	-	NM_004431.4	intergenic-EPHA2(intergenic:E15)	-	-	-	VUS
RS20062017FFP	JAK2	missense_variant	3	p.G13E	20.19%	1169	0	9	5022025	G	A	-	-	NM_004972.3	NM_004972.3(JAK2):c.38G>A(p.Gly13Glu)	c.38G>A	p.Gly13Glu	p.G13E	VUS
RS20062017FFP	NTRK3	splice_region_variant	13	p.G466S	27.41%	1215	0	15	88669502	C	T	-	-	NM_001012338.2	NM_001012338.2(NTRK3):c.1396G>A(p.Gly466Ser)	c.1396G>A	p.Gly466Ser	p.G466S	VUS
RS20062017FFP	MEF2B	missense_variant	3	p.L67V	25.10%	1721	0	19	19260094	G	C	-	-	NM_001145785.1	NM_001145785.1(MEF2B):c.199C>G(p.Leu67Val)	c.199C>G	p.Leu67Val	p.L67V	VUS
RS20062017FFP	CIC	missense_variant	5	p.Q247_K248delinsHE	4.51%	1219	0	19	42791855	GA	TG	-	-	NM_015125.4	NM_015125.4(CIC):c.741_742delinsTG(p.Gln247_Lys248delinsHisGlu)	c.741_742delinsTG	p.Gln247_Lys248delinsHisGlu	p.Q247_K248delinsHE	VUS
RS20062017FFP	PTPRT	missense_variant	6	p.I269M	16.88%	1712	0	20	41385154	G	C	-	-	NM_133170.3	NM_133170.3(PTPRT):c.807C>G(p.Ile269Met)	c.807C>G	p.Ile269Met	p.I269M	VUS
RS20062017FFP	PDGFRA	missense_variant	10	p.T489S	2.04%	1322	0	4	55139804	A	T	-	-	NM_006206.4	NM_006206.4(PDGFRA):c.1465A>T(p.Thr489Ser)	c.1465A>T	p.Thr489Ser	p.T489S	VUS
RS20062017FFP	PDCD1LG2	missense_variant	3	p.E33K	40.76%	1229	4.06944e-06	9	5534786	G	A	-	-	NM_025239.3	NM_025239.3(PDCD1LG2):c.97G>A(p.Glu33Lys)	c.97G>A	p.Glu33Lys	p.E33K	VUS
RS20062017FFP	TP53	missense_variant	8	p.D281V	73.35%	2972	0	17	7577096	T	A	rs587781525	COSM1649342,COSM45729,COSM562341,COSM4813641	NM_000546.5	NM_000546.5(TP53):c.842A>T(p.Asp281Val)	c.842A>T	p.Asp281Val	p.D281V	LP
RS20062689FFP	RECQL4	cn_amp	-	cn_amp	5.3	-	-	8q24.3	8q24.3	3	3	-	-	NM_004260.3	cn_amp	cn_amp	-	-	VUS
RS20062689FFP	RB1	large_genomic_rearrangement	18-27	exon18-27cn_del	0.2	-	-	13q14.2	49027097-49054260(+)	27	9	-	-	NM_000321.2	NM_000321.2(RB1):exon18-27cn_del	exon18-27cn_del	-	-	LP
RS20062689FFP	MYC	cn_amp	-	cn_amp	4.9	-	-	8q24.21	8q24.21	3	2	-	-	NM_002467.4	cn_amp	cn_amp	-	-	VUS
RS20062689FFP	TP53	missense_variant	5	p.K132N	80.43%	3127	0	17	7578534	C	A	rs866775781	COSM213188,COSM10991,COSM2157115,COSM3403291,COSM213187,COSM213186	NM_000546.5	NM_000546.5(TP53):c.396G>T(p.Lys132Asn)	c.396G>T	p.Lys132Asn	p.K132N	VUS
RS20062689FFP	EMSY	missense_variant	19	p.Q876K	4.22%	5099	0	11	76253283	C	A	-	-	NM_001300942.1	NM_001300942.1(EMSY):c.2626C>A(p.Gln876Lys)	c.2626C>A	p.Gln876Lys	p.Q876K	VUS
RS20062689FFP	KMT2D	missense_variant	14	p.V1382L	6.29%	2224	0	12	49441840	C	G	-	-	NM_003482.3	NM_003482.3(KMT2D):c.4144G>C(p.Val1382Leu)	c.4144G>C	p.Val1382Leu	p.V1382L	VUS
RS20062689FFP	PTPRD	missense_variant	41	p.I1705T	3.33%	1383	5.766e-05	9	8341102	A	G	rs201441177	-	NM_002839.3	NM_002839.3(PTPRD):c.5114T>C(p.Ile1705Thr)	c.5114T>C	p.Ile1705Thr	p.I1705T	VUS
RS20066808FFP	MET	gene_fusion	Intron2_5'UTR	MET-FLJ39095	13.96%	158	-	7	116340441	7:116340441_1:247268892	7:116340441_1:247268892	-	-	NM_000245.3	MET-FLJ39095(M2:F5'UTR)	-	-	-	VUS
RS20066808FFP	FGF7	missense_variant	4	p.R175T	6.42%	701	0	15	49776640	G	C	-	-	NM_002009.3	NM_002009.3(FGF7):c.524G>C(p.Arg175Thr)	c.524G>C	p.Arg175Thr	p.R175T	VUS
RS20066808FFP	PIK3CG	missense_variant	2	p.A545S	8.75%	3336	0	7	106509639	G	T	-	-	NM_001282426.1	NM_001282426.1(PIK3CG):c.1633G>T(p.Ala545Ser)	c.1633G>T	p.Ala545Ser	p.A545S	VUS
RS20066808FFP	TP53	missense_variant	8	p.R282W	12.87%	3350	0.0001538	17	7577094	G	A	rs28934574	COSM3378339,COSM10704,COSM99925,COSM1636702	NM_000546.5	NM_000546.5(TP53):c.844C>T(p.Arg282Trp)	c.844C>T	p.Arg282Trp	p.R282W	LP
RS20074138FFP	ETV6	gene_fusion	intergenic_Intron5	intergenic(ETV6,BCL2L14)-ETV6	1.95%	4194	-	12	12024956	12:12110706_12:12024956	12:12110706_12:12024956	-	-	NM_001987.4	intergenic-ETV6(intergenic:E6)	-	-	-	VUS
RS20074138FFP	ARID1A	missense_variant	12	p.E1075G	32.64%	4454	0	1	27097635	A	G	rs1005206083	-	NM_006015.4	NM_006015.4(ARID1A):c.3224A>G(p.Glu1075Gly)	c.3224A>G	p.Glu1075Gly	p.E1075G	VUS
RS20074138FFP	FGF3	missense_variant	2	p.V83L	3.13%	1851	0	11	69631165	C	G	-	-	NM_005247.2	NM_005247.2(FGF3):c.247G>C(p.Val83Leu)	c.247G>C	p.Val83Leu	p.V83L	VUS
RS20074138FFP	MAP2K2	splice_region_variant	8	c.984+4_984+27del	6.82%	733	0	19	4097249	GAAAAGCCAAAAGGCATCAAGCACA	G	-	-	NM_030662.3	NM_030662.3(MAP2K2):c.984+4_984+27del	c.984+4_984+27del	-	-	VUS
RS21003628FFP	SOX2	cn_amp	-	cn_amp	4	-	-	3q26.33	3q26.33	1	1	-	-	NM_003106.3	cn_amp	cn_amp	-	-	VUS
RS21003628FFP	DCUN1D1	cn_amp	-	cn_amp	3.9	-	-	3q26.33	3q26.33	1	1	-	-	NM_020640.3	cn_amp	cn_amp	-	-	VUS
RS21003628FFP	CSMD3	cn_amp	-	cn_amp	4	-	-	8q23.3	8q23.3	5	4	-	-	NM_198123.1	cn_amp	cn_amp	-	-	VUS
RS21003628FFP	MYC	cn_amp	-	cn_amp	4.1	-	-	8q24.21	8q24.21	3	2	-	-	NM_002467.4	cn_amp	cn_amp	-	-	VUS
RS21003628FFP	BCL6	cn_amp	-	cn_amp	4.2	-	-	3q27.3	3q27.3	8	8	-	-	NM_001130845.1	cn_amp	cn_amp	-	-	VUS
RS21003628FFP	TP63	cn_amp	-	cn_amp	4.1	-	-	3q28	3q28	16	14	-	-	NM_003722.4	cn_amp	cn_amp	-	-	VUS
RS21003628FFP	PIK3CA	cn_amp	-	cn_amp	3.6	-	-	3q26.32	3q26.32	2	2	-	-	NM_006218.3	cn_amp	cn_amp	-	-	VUS
RS21003628FFP	TIPARP	cn_amp	-	cn_amp	3.8	-	-	3q25.31	3q25.31	16	11	-	-	NM_001184717.1	cn_amp	-	-	-	VUS
RS21003628FFP	JAK2	splice_region_variant	11	c.1327-9C>G	20.57%	768	0	9	5069013	C	G	-	-	NM_004972.3	NM_004972.3(JAK2):c.1327-9C>G	c.1327-9C>G	-	-	VUS
RS21003628FFP	TP53	missense_variant	5	p.H179P	85.35%	3639	0	17	7578394	T	G	rs1057519991	COSM3958832,COSM3958831,COSM3958829,COSM3958828,COSM3958833,COSM44218,COSM3958830	NM_000546.5	NM_000546.5(TP53):c.536A>C(p.His179Pro)	c.536A>C	p.His179Pro	p.H179P	LP
RS21008458FFP	BRIP1	large_genomic_rearrangement	18-20	exon18-20cn_amp	3	-	-	17q23.2	59760634-59770951(-)	19	3	-	-	NM_032043.2	NM_032043.2(BRIP1):exon18-20cn_amp	exon18-20cn_amp	-	-	VUS
RS21008458FFP	CASP8	large_genomic_rearrangement	Exon3_Exon5	exon3-5amp	27.41%	991	-	2	202136388	2:202136388_2:202125344	2:202136388_2:202125344	-	-	NM_001228.4	NM_001228.4(CASP8):c.-26-5840_507+44dup	c.-26-5840_507+44dup	-	-	VUS
RS21008458FFP	TP53	missense_variant	8	p.R273H	17.85%	2515	0.000199681	17	7577120	C	T	rs28934576	COSM10660,COSM1645335,COSM99729,COSM3356963	NM_000546.5	NM_000546.5(TP53):c.818G>A(p.Arg273His)	c.818G>A	p.Arg273His	p.R273H	P
RS21008458FFP	AURKB	missense_variant	8	p.N280K	17.33%	1408	2.4429e-05	17	8108558	G	T	rs565442198	-	NM_001284526.1	NM_001284526.1(AURKB):c.840C>A(p.Asn280Lys)	c.840C>A	p.Asn280Lys	p.N280K	VUS
RS21008458FFP	MSH2	missense_variant	3	p.Q183L	15.75%	1359	0	2	47637414	A	T	-	-	NM_000251.2	NM_000251.2(MSH2):c.548A>T(p.Gln183Leu)	c.548A>T	p.Gln183Leu	p.Q183L	VUS
RS21011671FFP	NSD2	cn_amp	-	cn_amp	3.3	-	-	4p16.3	4p16.3	5	5	-	-	NM_001042424.2	cn_amp	cn_amp	-	-	VUS
RS21011671FFP	CSMD3	cn_amp	-	cn_amp	3.6	-	-	8q23.3	8q23.3	5	4	-	-	NM_198123.1	cn_amp	cn_amp	-	-	VUS
RS21011671FFP	FGFR3	cn_amp	-	cn_amp	3.3	-	-	4p16.3	4p16.3	9	7	-	-	NM_000142.4	cn_amp	cn_amp	-	-	VUS
RS21011671FFP	MYC	cn_amp	-	cn_amp	9.2	-	-	8q24.21	8q24.21	3	2	-	-	NM_002467.4	cn_amp	cn_amp	-	-	VUS
RS21011671FFP	SMARCB1	cn_amp	-	cn_amp	3.5	-	-	22q11.23	22q11.23	9	9	-	-	NM_003073.4	cn_amp	cn_amp	-	-	VUS
RS21011671FFP	TP53	missense_variant	7	p.R249S	43.69%	2989	0	17	7577534	C	G	rs28934571	COSM1679495,COSM10785,COSM255317,COSM255318,COSM3773302	NM_000546.5	NM_000546.5(TP53):c.747G>C(p.Arg249Ser)	c.747G>C	p.Arg249Ser	p.R249S	VUS
RS21011671FFP	PTPRD	missense_variant	22	p.R540C	13.99%	1122	8.236e-06	9	8507360	G	A	rs770164058	-	NM_002839.3	NM_002839.3(PTPRD):c.1618C>T(p.Arg540Cys)	c.1618C>T	p.Arg540Cys	p.R540C	VUS
RS21011671FFP	MYCN	missense_variant	2	p.G101V	17.75%	1307	0	2	16082488	G	T	-	-	NM_001293228.1	NM_001293228.1(MYCN):c.302G>T(p.Gly101Val)	c.302G>T	p.Gly101Val	p.G101V	VUS
RS21011671FFP	NOTCH1	missense_variant	7	p.A396P	12.45%	819	0	9	139412658	C	G	-	-	NM_017617.4	NM_017617.4(NOTCH1):c.1186G>C(p.Ala396Pro)	c.1186G>C	p.Ala396Pro	p.A396P	VUS
RS21011671FFP	BRCA1	missense_variant	10	p.S889C	12.81%	1171	0	17	41244882	G	C	-	-	NM_007294.3	NM_007294.3(BRCA1):c.2666C>G(p.Ser889Cys)	c.2666C>G	p.Ser889Cys	p.S889C	VUS
RS21011675FFP	SOX2	cn_amp	-	cn_amp	3.6	-	-	3q26.33	3q26.33	1	1	-	-	NM_003106.3	cn_amp	cn_amp	-	-	VUS
RS21011675FFP	CRKL	cn_amp	-	cn_amp	3.9	-	-	22q11.21	22q11.21	3	3	-	-	NM_005207.3	cn_amp	cn_amp	-	-	VUS
RS21011675FFP	RECQL4	cn_amp	-	cn_amp	3.9	-	-	8q24.3	8q24.3	3	3	-	-	NM_004260.3	cn_amp	cn_amp	-	-	VUS
RS21011675FFP	ZNRF3	cn_amp	-	cn_amp	4.5	-	-	22q12.1	22q12.1	4	2	-	-	NM_001206998.1	cn_amp	cn_amp	-	-	VUS
RS21011675FFP	EWSR1	cn_amp	-	cn_amp	4.2	-	-	22q12.2	22q12.2	15	3	-	-	NM_013986.3	cn_amp	cn_amp	-	-	VUS
RS21011675FFP	DCUN1D1	cn_amp	-	cn_amp	3.5	-	-	3q26.33	3q26.33	1	1	-	-	NM_020640.3	cn_amp	cn_amp	-	-	VUS
RS21011675FFP	CHEK2	cn_amp	-	cn_amp	3.9	-	-	22q12.1	22q12.1	14	14	-	-	NM_007194.3	cn_amp	cn_amp	-	-	VUS
RS21011675FFP	MYC	cn_amp	-	cn_amp	3.8	-	-	8q24.21	8q24.21	3	2	-	-	NM_002467.4	cn_amp	cn_amp	-	-	VUS
RS21011675FFP	NF2	cn_amp	-	cn_amp	4.5	-	-	22q12.2	22q12.2	14	9	-	-	NM_000268.3	cn_amp	cn_amp	-	-	VUS
RS21011675FFP	SMARCB1	cn_amp	-	cn_amp	3.9	-	-	22q11.23	22q11.23	9	9	-	-	NM_003073.4	cn_amp	cn_amp	-	-	VUS
RS21011675FFP	BCL6	cn_amp	-	cn_amp	3.7	-	-	3q27.3	3q27.3	8	8	-	-	NM_001130845.1	cn_amp	cn_amp	-	-	VUS
RS21011675FFP	TP63	cn_amp	-	cn_amp	3.7	-	-	3q28	3q28	16	14	-	-	NM_003722.4	cn_amp	cn_amp	-	-	VUS
RS21011675FFP	POLE	missense_variant	31	p.R1286C	5.06%	2176	7.78e-05	12	133226041	G	A	rs373170535	-	NM_006231.3	NM_006231.3(POLE):c.3856C>T(p.Arg1286Cys)	c.3856C>T	p.Arg1286Cys	p.R1286C	VUS
RS21011675FFP	PIK3CA	missense_variant	10	p.E545K	23.80%	1496	8.279e-06	3	178936091	G	A	rs104886003	COSM125370,COSM763	NM_006218.3	NM_006218.3(PIK3CA):c.1633G>A(p.Glu545Lys)	c.1633G>A	p.Glu545Lys	p.E545K	LP
RS21011675FFP	TP53	missense_variant	7	p.Y234C	62.30%	1634	8.236e-06	17	7577580	T	C	rs587780073	COSM10725,COSM3388193,COSM165072,COSM165074,COSM165073,COSM1646849	NM_000546.5	NM_000546.5(TP53):c.701A>G(p.Tyr234Cys)	c.701A>G	p.Tyr234Cys	p.Y234C	LP
RS21011675FFP	H3F3A	missense_variant	2	p.Q6P	5.76%	469	0	1	226252069	A	C	-	-	NM_002107.4	NM_002107.4(H3F3A):c.17A>C(p.Gln6Pro)	c.17A>C	p.Gln6Pro	p.Q6P	VUS
RS21011675FFP	INPP4A	missense_variant	21	p.D738Y	30.33%	920	0	2	99182147	G	T	-	-	NM_001134224.1	NM_001134224.1(INPP4A):c.2212G>T(p.Asp738Tyr)	c.2212G>T	p.Asp738Tyr	p.D738Y	VUS
RS21011675FFP	PTPRT	missense_variant	12	p.R653W	33.11%	758	0.000199681	20	40944545	G	A	rs200852571	-	NM_133170.3	NM_133170.3(PTPRT):c.1957C>T(p.Arg653Trp)	c.1957C>T	p.Arg653Trp	p.R653W	VUS
RS21011675FFP	NOTCH1	missense_variant	34	p.I2244F	5.97%	1038	0	9	139391461	T	A	-	-	NM_017617.4	NM_017617.4(NOTCH1):c.6730A>T(p.Ile2244Phe)	c.6730A>T	p.Ile2244Phe	p.I2244F	VUS
RS21012415FFP	MYC	cn_amp	-	cn_amp	4.2	-	-	8q24.21	8q24.21	3	2	-	-	NM_002467.4	cn_amp	cn_amp	-	-	VUS
RS21012415FFP	CSF3R	cn_amp	-	cn_amp	3.6	-	-	1p34.3	1p34.3	12	12	-	-	NM_156039.3	cn_amp	cn_amp	-	-	VUS
RS21012415FFP	MYCL	cn_amp	-	cn_amp	3.7	-	-	-	-	11	9	-	-	NM_001033082.2	cn_amp	-	-	-	VUS
RS21012415FFP	FGFR2	conservative_inframe_deletion	13	p.P581_E585del	14.46%	2013	0	10	123256148	GGAGTACTCCATCCCGGGTGG	AGAGTA	-	-	NM_000141.4	NM_000141.4(FGFR2):c.1741_1761delinsTACTCT(p.Pro581_Glu585del)	c.1741_1761delinsTACTCT	p.Pro581_Glu585del	p.P581_E585del	VUS
RS21012415FFP	TP53	disruptive_inframe_deletion	6	p.E204_D208delinsAYY	46.94%	2482	0	17	7578227	CATCCAAATACT	AATACG	-	-	NM_000546.5	NM_000546.5(TP53):c.611_622delinsCGTATT(p.Glu204_Asp208delinsAlaTyrTyr)	c.611_622delinsCGTATT	p.Glu204_Asp208delinsAlaTyrTyr	p.E204_D208delinsAYY	VUS
RS21012415FFP	EGFR	splice_acceptor_variant	15	c.1723-1G>T	30.34%	1948	0	7	55232972	G	T	-	-	NM_005228.3	NM_005228.3(EGFR):c.1723-1G>T	c.1723-1G>T	-	-	VUS
RS21012415FFP	RBM10	missense_variant	5	p.V219L	15.20%	783	0	X	47032554	G	C	-	-	NM_001204468.1	NM_001204468.1(RBM10):c.655G>C(p.Val219Leu)	c.655G>C	p.Val219Leu	p.V219L	VUS
RS21013982FFP	PIK3CB	cn_amp	-	cn_amp	4.8	-	-	3q22.3	3q22.3	22	22	-	-	NM_006219.2	cn_amp	cn_amp	-	-	VUS
RS21013982FFP	ATR	cn_amp	-	cn_amp	4.6	-	-	3q23	3q23	47	47	-	-	NM_001184.3	cn_amp	cn_amp	-	-	VUS
RS21013982FFP	EPHB1	cn_amp	-	cn_amp	5.8	-	-	3q22.2	3q22.2	16	13	-	-	NM_004441.4	cn_amp	cn_amp	-	-	VUS
RS21013982FFP	TIPARP	cn_amp	-	cn_amp	5.3	-	-	3q25.31	3q25.31	16	11	-	-	NM_001184717.1	cn_amp	-	-	-	VUS
RS21013982FFP	CDKN1B	gene_fusion	Exon1_Intron2	CDKN1B-GPR19	4.00%	2207	-	12	12871025	12:12871025_12:12839311	12:12871025_12:12839311	-	-	NM_004064.4	CDKN1B-GPR19(C5'UTR:G5'UTR)	-	-	-	LP
RS21013982FFP	SMARCA4	large_genomic_rearrangement	Exon16_Exon31	exon16-31amp	17.92%	3261	-	19	11121111	19:11153997_19:11121111	19:11153997_19:11121111	-	-	NM_001128849.1	NM_001128849.2(SMARCA4):c.2178_4520+1761dup	c.2178_4520+1761dup	-	-	LP
RS21013982FFP	SMO	missense_variant	8	p.R482H	2.20%	1725	0.0001	7	128849217	G	A	rs763900781	-	NM_005631.4	NM_005631.4(SMO):c.1445G>A(p.Arg482His)	c.1445G>A	p.Arg482His	p.R482H	VUS
RS21013982FFP	TP53	stop_gained	5	p.Y126*	71.06%	2405	0	17	7578552	G	T	-	COSM2744963,COSM4271993,COSM2744961,COSM10888,COSM2744962,COSM2744960	NM_000546.5	NM_000546.5(TP53):c.378C>A(p.Tyr126*)	c.378C>A	p.Tyr126*	p.Y126*	LP
RS21013982FFP	FAT1	stop_gained	2	p.E1021*	3.63%	1018	0	4	187627921	C	A	-	-	NM_005245.3	NM_005245.3(FAT1):c.3061G>T(p.Glu1021*)	c.3061G>T	p.Glu1021*	p.E1021*	VUS
RS21013982FFP	INHBA	missense_variant	3	p.M401I	2.41%	2818	0	7	41729326	C	T	-	-	NM_002192.3	NM_002192.3(INHBA):c.1203G>A(p.Met401Ile)	c.1203G>A	p.Met401Ile	p.M401I	VUS
RS21013982FFP	NTRK2	missense_variant	11	p.I330M	29.14%	1822	0	9	87342705	C	G	-	-	NM_006180.4	NM_006180.4(NTRK2):c.990C>G(p.Ile330Met)	c.990C>G	p.Ile330Met	p.I330M	VUS
RS21016217FFP	NSD2	cn_amp	-	cn_amp	3.4	-	-	4p16.3	4p16.3	5	5	-	-	NM_001042424.2	cn_amp	cn_amp	-	-	VUS
RS21016217FFP	FGFR3	cn_amp	-	cn_amp	3.5	-	-	4p16.3	4p16.3	9	7	-	-	NM_000142.4	cn_amp	cn_amp	-	-	VUS
RS21016217FFP	PIK3CG	cn_amp	-	cn_amp	3.4	-	-	7q22.3	7q22.3	10	8	-	-	NM_001282426.1	cn_amp	cn_amp	-	-	VUS
RS21016217FFP	MET	cn_amp	-	cn_amp	4.2	-	-	7q31.2	7q31.2	28	28	-	-	NM_000245.3	cn_amp	cn_amp	-	-	VUS
RS21016217FFP	MYC	cn_amp	-	cn_amp	3.8	-	-	8q24.21	8q24.21	3	2	-	-	NM_002467.4	cn_amp	cn_amp	-	-	VUS
RS21016217FFP	GSK3B	cn_amp	-	cn_amp	3.3	-	-	3q13.33	3q13.33	12	11	-	-	NM_002093.3	cn_amp	cn_amp	-	-	VUS
RS21016217FFP	IL7R	cn_amp	-	cn_amp	4.2	-	-	5p13.2	5p13.2	8	8	-	-	NM_002185.3	cn_amp	cn_amp	-	-	VUS
RS21016217FFP	SPTA1	missense_variant	33	p.S1552C	38.09%	1192	0	1	158612283	G	C	-	-	NM_003126.2	NM_003126.2(SPTA1):c.4655C>G(p.Ser1552Cys)	c.4655C>G	p.Ser1552Cys	p.S1552C	VUS
RS21016217FFP	PTCH1	missense_variant	8	p.A393V	36.36%	2261	0.000199681	9	98241319	G	A	rs202020837	-	NM_000264.3	NM_000264.3(PTCH1):c.1178C>T(p.Ala393Val)	c.1178C>T	p.Ala393Val	p.A393V	VUS
RS21016217FFP	ERRFI1	missense_variant	4	p.V111D	17.11%	1268	0	1	8074327	A	T	-	-	NM_018948.3	NM_018948.3(ERRFI1):c.332T>A(p.Val111Asp)	c.332T>A	p.Val111Asp	p.V111D	VUS
RS21016217FFP	MITF	missense_variant	9	p.M410V	15.62%	1293	0	3	70014367	A	G	-	-	NM_000248.3	NM_000248.3(MITF):c.1228A>G(p.Met410Val)	c.1228A>G	p.Met410Val	p.M410V	VUS
RS21016217FFP	MAGI2	missense_variant	10	p.T618S	14.56%	1841	0	7	77885454	G	C	-	-	NM_012301.3	NM_012301.3(MAGI2):c.1853C>G(p.Thr618Ser)	c.1853C>G	p.Thr618Ser	p.T618S	VUS
RS21016217FFP	LYN	missense_variant	4	p.I67L	43.52%	1027	0	8	56860197	A	C	-	-	NM_002350.3	NM_002350.3(LYN):c.199A>C(p.Ile67Leu)	c.199A>C	p.Ile67Leu	p.I67L	VUS
RS21016217FFP	TP53	missense_variant	6	p.H193R	71.56%	3836	0	17	7578271	T	C	rs786201838	COSM1740322,COSM308307,COSM3820719,COSM308309,COSM308306,COSM308308,COSM10742	NM_000546.5	NM_000546.5(TP53):c.578A>G(p.His193Arg)	c.578A>G	p.His193Arg	p.H193R	LP
RS21017464FFP	RPA1	cn_amp	-	cn_amp	3.9	-	-	17p13.3	17p13.3	17	13	-	-	NM_002945.3	-	-	-	-	VUS
RS21017464FFP	NF1	gene_fusion	Intron39_intergenic	NF1-intergenic(TMC3-AS1,MEX3B)	48.44%	152	-	17	29662167	17:29662167_15:82306177	17:29662167_15:82306177	-	-	NM_000267.3	NF1-intergenic(N39:intergenic)	-	-	-	LP
RS21017464FFP	MAP3K1	gene_fusion	Exon15_intergenic	MAP3K1-intergenic(PLPP1,SLC38A9)	2.80%	1997	-	5	56179477	5:56179477_5:54833741	5:56179477_5:54833741	-	-	NM_005921.1	MAP3K1-intergenic(M14:intergenic)	-	-	-	LP
RS21017464FFP	TP53	frameshift_variant	5	p.T155fs	68.39%	7159	0	17	7578468	G	GC	-	-	NM_000546.5	NM_000546.5(TP53):c.461dup(p.Thr155fs)	c.461dup	p.Thr155fs	p.T155fs	LP
RS21017464FFP	AKT1	missense_variant	14	p.V429I	32.49%	948	0	14	105237160	C	T	-	-	NM_001014432.1	NM_001014432.1(AKT1):c.1285G>A(p.Val429Ile)	c.1285G>A	p.Val429Ile	p.V429I	VUS
RS21017464FFP	KMT2D	missense_variant	8	p.P367R	31.70%	3555	0	12	49446710	G	C	-	-	NM_003482.3	NM_003482.3(KMT2D):c.1100C>G(p.Pro367Arg)	c.1100C>G	p.Pro367Arg	p.P367R	VUS
RS21017464FFP	NF1	splice_acceptor_variant	7	p.A219fs	3.06%	916	0	17	29508720	ATTTATAGGCATTTTG	TT	-	-	NM_000267.3	NM_000267.3(NF1):c.655-8_662delinsTT(p.Ala219fs)	c.655-8_662delinsTT	p.Ala219fs	p.A219fs	LP
RS21017464FFP	GATA2	missense_variant	4	p.A164S	2.43%	1524	0	3	128204951	C	A	-	-	NM_001145661.1	NM_001145661.1(GATA2):c.490G>T(p.Ala164Ser)	c.490G>T	p.Ala164Ser	p.A164S	VUS
RS21020791FFP	PREX2	cn_amp	-	cn_amp	3.5	-	-	8q13.2	8q13.2	28	28	-	-	NM_024870.3	cn_amp	cn_amp	-	-	VUS
RS21020791FFP	PRDM1	cn_amp	-	cn_amp	5.2	-	-	6q21	6q21	8	8	-	-	NM_001198.3	cn_amp	cn_amp	-	-	VUS
RS21020791FFP	LYN	cn_amp	-	cn_amp	3.4	-	-	8q12.1	8q12.1	12	12	-	-	NM_002350.3	cn_amp	cn_amp	-	-	VUS
RS21020791FFP	SOX17	cn_amp	-	cn_amp	4	-	-	8q11.23	8q11.23	2	2	-	-	NM_022454.3	cn_amp	cn_amp	-	-	VUS
RS21020791FFP	ARID2	cn_amp	-	cn_amp	3.4	-	-	12q12	12q12	19	16	-	-	NM_152641.2	cn_amp	cn_amp	-	-	VUS
RS21020791FFP	PIK3CA	large_genomic_rearrangement	Exon15_Exon19	exon15-19del	12.57%	1890	-	3	178947812	3:178939107_3:178947812	3:178939107_3:178947812	-	-	NM_006218.3	NM_006218.4(PIK3CA):c.2187+163_2686del	c.2187+163_2686del	-	-	VUS
RS21020791FFP	BRCA2	frameshift_variant	7	p.I180fs	37.61%	1162	0	13	32900654	CAT	C	rs80359510	-	NM_000059.3	NM_000059.3(BRCA2):c.538_539del(p.Ile180fs)	c.538_539del	p.Ile180fs	p.I180fs	P
RS21020791FFP	NTRK1	missense_variant	13	p.E492Q	6.74%	2598	0	1	156845952	G	C	-	-	NM_001007792.1	NM_001007792.1(NTRK1):c.1474G>C(p.Glu492Gln)	c.1474G>C	p.Glu492Gln	p.E492Q	VUS
RS21020791FFP	ABL2	missense_variant	12	p.R764G	7.93%	3467	0	1	179078112	G	C	-	-	NM_007314.3	NM_007314.3(ABL2):c.2290C>G(p.Arg764Gly)	c.2290C>G	p.Arg764Gly	p.R764G	VUS
RS21020791FFP	NFKBIA	frameshift_variant	3	p.L148fs	5.93%	2531	0	14	35872460	A	AG	-	-	NM_020529.2	NM_020529.2(NFKBIA):c.442dup(p.Leu148fs)	c.442dup	p.Leu148fs	p.L148fs	LP
RS21020791FFP	TSHR	missense_variant	10	p.E358K	16.02%	3395	0	14	81609474	G	A	-	-	NM_000369.2	NM_000369.2(TSHR):c.1072G>A(p.Glu358Lys)	c.1072G>A	p.Glu358Lys	p.E358K	VUS
RS21020791FFP	CHD2	missense_variant	37	p.S1593C	11.59%	2200	0	15	93558011	C	G	-	-	NM_001271.3	NM_001271.3(CHD2):c.4778C>G(p.Ser1593Cys)	c.4778C>G	p.Ser1593Cys	p.S1593C	VUS
RS21020791FFP	CHEK2	splice_acceptor_variant	12	p.L421fs	12.91%	573	0	22	29091211	AAGGTGGATACCCACTAAGGCTTAATATTGGTAGAGAGAGAAAGGAAAAGAAATCAAGTGGCATTCTCAGTGGCATTC	A	-	-	NM_007194.3	NM_007194.3(CHEK2):c.1260-58_1278del(p.Leu421fs)	c.1260-58_1278del	p.Leu421fs	p.L421fs	LP
RS21020791FFP	TET2	missense_variant	11	p.E1930D	2.61%	2182	0	4	106197457	A	C	-	-	NM_001127208.2	NM_001127208.2(TET2):c.5790A>C(p.Glu1930Asp)	c.5790A>C	p.Glu1930Asp	p.E1930D	VUS
RS21020791FFP	H3C2	missense_variant	1	p.A32V	7.26%	3087	0	6	26032194	G	A	-	-	NM_003537.3	NM_003537.3(H3C2):c.95C>T(p.Ala32Val)	c.95C>T	p.Ala32Val	p.A32V	VUS
RS21020791FFP	HGF	missense_variant	9	p.G359V	9.36%	2020	0	7	81355298	C	A	-	-	NM_000601.5	NM_000601.5(HGF):c.1076G>T(p.Gly359Val)	c.1076G>T	p.Gly359Val	p.G359V	VUS
RS21020791FFP	RECQL4	splice_acceptor_variant	11	p.I569fs	4.85%	1588	0	8	145739721	AGCACGTGTACCTGGGCTGCCCGAATCTGAAGGCAGCAAGATCAGAG	A	-	-	NM_004260.3	NM_004260.3(RECQL4):c.1705-21_1729del(p.Ile569fs)	c.1705-21_1729del	p.Ile569fs	p.I569fs	VUS
RS21020791FFP	TP53	stop_gained	6	p.R196*	34.56%	5993	8.236e-06	17	7578263	G	A	rs397516435	COSM99668,COSM99667,COSM10705,COSM99665,COSM3378446,COSM99666,COSM1640847	NM_000546.5	NM_000546.5(TP53):c.586C>T(p.Arg196*)	c.586C>T	p.Arg196*	p.R196*	P
RS21024863FFP	TP53	splice_donor_variant	7	c.782+1G>T	18.76%	3134	0	17	7577498	C	A	-	COSM2744561,COSM473431,COSM3958806,COSM473430,COSM44640	NM_000546.5	NM_000546.5(TP53):c.782+1G>T	c.782+1G>T	-	-	LP
RS21024863FFP	EPHA2	missense_variant	16	p.S910C	5.16%	1608	0	1	16456025	G	C	-	-	NM_004431.4	NM_004431.4(EPHA2):c.2729C>G(p.Ser910Cys)	c.2729C>G	p.Ser910Cys	p.S910C	VUS
RS21024863FFP	FLT4	missense_variant	17	p.P841H	5.43%	1714	0	5	180047193	G	T	-	-	NM_182925.4	NM_182925.4(FLT4):c.2522C>A(p.Pro841His)	c.2522C>A	p.Pro841His	p.P841H	VUS
RS21024863FFP	ROS1	frameshift_variant	43	p.E2298fs	3.68%	2204	0	6	117609771	GTGGTTCCTTCTCTTCTTTCCTCAGACCACAAGAT	G	-	-	NM_002944.2	NM_002944.2(ROS1):c.6894_6927del(p.Glu2298fs)	c.6894_6927del	p.Glu2298fs	p.E2298fs	VUS
RS21024863FFP	KDM6A	missense_variant	18	p.G787R	6.47%	1933	0	X	44929103	G	C	-	-	NM_001291415.1	NM_001291415.1(KDM6A):c.2359G>C(p.Gly787Arg)	c.2359G>C	p.Gly787Arg	p.G787R	VUS
RS21025586FFP	RECQL4	cn_amp	-	cn_amp	4.2	-	-	8q24.3	8q24.3	3	3	-	-	NM_004260.3	cn_amp	cn_amp	-	-	VUS
RS21025586FFP	DNMT3A	cn_amp	-	cn_amp	4.4	-	-	2p23.3	2p23.3	23	21	-	-	NM_022552.4	cn_amp	cn_amp	-	-	VUS
RS21025586FFP	MYCN	cn_amp	-	cn_amp	4.4	-	-	2p24.3	2p24.3	3	2	-	-	NM_001293228.1	cn_amp	cn_amp	-	-	VUS
RS21025586FFP	NF1	gene_fusion	Intron4_Intron11	NF1-MYO9B	46.38%	308	-	17	29496799	17:29496799_19:17280384	17:29496799_19:17280384	-	-	NM_000267.3	NF1-MYO9B(N5:M12)	-	-	-	LP
RS21025586FFP	DNMT3A	gene_fusion	Intron18_intergenic	DNMT3A-intergenic(STXBP6,NOVA1)	13.74%	3337	-	2	25463485	2:25463485_14:25624745	2:25463485_14:25624745	-	-	NM_022552.4	DNMT3A-intergenic(D18:intergenic)	-	-	-	LP
RS21025586FFP	TP53	missense_variant	8	p.P278R	71.81%	5346	0	17	7577105	G	C	rs876659802	COSM10887,COSM1646811,COSM300205,COSM3773296	NM_000546.5	NM_000546.5(TP53):c.833C>G(p.Pro278Arg)	c.833C>G	p.Pro278Arg	p.P278R	VUS
RS21025586FFP	TBX3	missense_variant	8	p.S705F	39.21%	3568	0	12	115109764	G	A	-	-	NM_016569.3	NM_016569.3(TBX3):c.2114C>T(p.Ser705Phe)	c.2114C>T	p.Ser705Phe	p.S705F	VUS
RS21025586FFP	POLE	missense_variant	32	p.H1356D	41.05%	2507	0.000199681	12	133225598	G	C	rs557732922	COSM5980436,COSM5980437	NM_006231.3	NM_006231.3(POLE):c.4066C>G(p.His1356Asp)	c.4066C>G	p.His1356Asp	p.H1356D	VUS
RS21025592FFP	PPP2R1A	missense_variant	5	p.P179R	4.81%	1767	0	19	52715971	C	G	rs786205228	COSM86034	NM_014225.5	NM_014225.5(PPP2R1A):c.536C>G(p.Pro179Arg)	c.536C>G	p.Pro179Arg	p.P179R	VUS
RS21025592FFP	TP53	missense_variant	6	p.G199V	4.43%	3114	0	17	7578253	C	A	-	COSM255788,COSM3675525,COSM44140,COSM255787,COSM255790,COSM255789,COSM3675524	NM_000546.5	NM_000546.5(TP53):c.596G>T(p.Gly199Val)	c.596G>T	p.Gly199Val	p.G199V	LP
RS21025592FFP	APC	missense_variant	16	p.A2286D	2.76%	1233	0	5	112178148	C	A	-	-	NM_000038.5	NM_000038.5(APC):c.6857C>A(p.Ala2286Asp)	c.6857C>A	p.Ala2286Asp	p.A2286D	VUS
RS21025592FFP	FGFR1	stop_gained	3	p.S107*	16.93%	1494	0	8	38287238	G	T	-	-	NM_023110.2	NM_023110.2(FGFR1):c.320C>A(p.Ser107*)	c.320C>A	p.Ser107*	p.S107*	LP
RS21025592FFP	KDM6A	missense_variant	28	p.T1351N	2.19%	1464	0	X	44966672	C	A	-	-	NM_001291415.1	NM_001291415.1(KDM6A):c.4052C>A(p.Thr1351Asn)	c.4052C>A	p.Thr1351Asn	p.T1351N	VUS
RS21032755FFP	NTRK3	cn_amp	-	cn_amp	4.3	-	-	15q25.3	15q25.3	17	9	-	-	NM_001012338.2	cn_amp	cn_amp	-	-	VUS
RS21032755FFP	FANCI	cn_amp	-	cn_amp	4.7	-	-	15q26.1	15q26.1	33	28	-	-	NM_001113378.1	cn_amp	cn_amp	-	-	VUS
RS21032755FFP	IDH2	cn_amp	-	cn_amp	4.7	-	-	15q26.1	15q26.1	10	8	-	-	NM_002168.3	cn_amp	cn_amp	-	-	VUS
RS21032755FFP	BLM	cn_amp	-	cn_amp	5.1	-	-	15q26.1	15q26.1	21	18	-	-	NM_000057.3	cn_amp	cn_amp	-	-	VUS
RS21032755FFP	CHD2	cn_amp	-	cn_amp	4.7	-	-	15q26.1	15q26.1	22	16	-	-	NM_001271.3	cn_amp	cn_amp	-	-	VUS
RS21032755FFP	IGF1R	cn_amp	-	cn_amp	4.8	-	-	15q26.3	15q26.3	21	16	-	-	NM_000875.4	cn_amp	cn_amp	-	-	VUS
RS21032755FFP	CSMD3	cn_amp	-	cn_amp	4.3	-	-	8q23.3	8q23.3	5	4	-	-	NM_198123.1	cn_amp	cn_amp	-	-	VUS
RS21032755FFP	MYC	cn_amp	-	cn_amp	4.3	-	-	8q24.21	8q24.21	3	2	-	-	NM_002467.4	cn_amp	cn_amp	-	-	VUS
RS21032755FFP	BRCA2	frameshift_variant	10	p.K437fs	73.81%	1027	0.0002401	13	32906915	AAAAG	A	rs80359277	COSM5951112,COSM5951111	NM_000059.3	NM_000059.3(BRCA2):c.1310_1313del(p.Lys437fs)	c.1310_1313del	p.Lys437fs	p.K437fs	P
RS21032755FFP	TP53	missense_variant	5	p.C135Y	69.16%	1965	0	17	7578526	C	T	rs587781991	COSM99601,COSM10801,COSM99600,COSM3691869,COSM99599,COSM99598,COSM2744946	NM_000546.5	NM_000546.5(TP53):c.404G>A(p.Cys135Tyr)	c.404G>A	p.Cys135Tyr	p.C135Y	LP
RS21032755FFP	CALR	missense_variant	9	p.D362E	38.38%	1063	4.12283e-06	19	13054559	C	G	rs151032910	-	NM_004343.3	NM_004343.3(CALR):c.1086C>G(p.Asp362Glu)	c.1086C>G	p.Asp362Glu	p.D362E	VUS
RS21032755FFP	MSH6	frameshift_variant	4	p.L712fs	39.69%	1572	0	2	48027254	CCTTGGATTCTGACACAGTCAGCA	C	-	-	NM_000179.2	NM_000179.2(MSH6):c.2135_2157del(p.Leu712fs)	c.2135_2157del	p.Leu712fs	p.L712fs	LP
RS21032755FFP	MST1R	missense_variant	1	p.T278P	40.47%	1500	0	3	49940211	T	G	-	-	NM_002447.3	NM_002447.3(MST1R):c.832A>C(p.Thr278Pro)	c.832A>C	p.Thr278Pro	p.T278P	VUS
RS21045811FFP	CCNE1	cn_amp	-	cn_amp	8.3	-	-	19q12	19q12	4	4	-	-	NM_001238.3	cn_amp	cn_amp	-	-	VUS
RS21045811FFP	TP53	missense_variant	7	p.Y236N	85.82%	1058	0	17	7577575	A	T	rs587782289	COSM1157851,COSM1644276,COSM1157853,COSM43826,COSM1157852,COSM3388353	NM_000546.5	NM_000546.5(TP53):c.706T>A(p.Tyr236Asn)	c.706T>A	p.Tyr236Asn	p.Y236N	VUS
RS21045811FFP	ERCC5	frameshift_variant	11	p.H820fs	59.71%	1556	0	13	103519121	ATGTCTAT	C	-	-	NM_000123.3	NM_000123.3(ERCC5):c.2459_2466delinsC(p.His820fs)	c.2459_2466delinsC	p.His820fs	p.H820fs	VUS
RS21045812FFP	KMT2C	missense_variant	17	p.N938H	16.87%	966	0	7	151927364	T	G	-	-	NM_170606.2	NM_170606.2(KMT2C):c.2812A>C(p.Asn938His)	c.2812A>C	p.Asn938His	p.N938H	VUS
RS21045812FFP	TP53	missense_variant	5	p.Q136E	5.75%	2297	0	17	7578524	G	C	-	COSM43767,COSM437598,COSM437597,COSM3403290,COSM437599,COSM2153121,COSM437600	NM_000546.5	NM_000546.5(TP53):c.406C>G(p.Gln136Glu)	c.406C>G	p.Gln136Glu	p.Q136E	VUS
RS21045812FFP	TBX3	missense_variant	1	p.F41L	24.47%	658	8.293e-06	12	115120885	A	G	rs773465438	-	NM_016569.3	NM_016569.3(TBX3):c.121T>C(p.Phe41Leu)	c.121T>C	p.Phe41Leu	p.F41L	VUS
RS21045812FFP	AMER1	missense_variant	2	p.A595T	14.43%	1247	9.47e-05	X	63411384	C	T	rs149055969	COSM5977539,COSM5977540	NM_152424.3	NM_152424.3(AMER1):c.1783G>A(p.Ala595Thr)	c.1783G>A	p.Ala595Thr	p.A595T	LB
RS21045812FFP	TP53	missense_variant	5	p.A138V	33.79%	2486	8.236e-06	17	7578517	G	A	rs750600586	COSM288784,COSM43818,COSM3421938,COSM288786,COSM288787,COSM3421939,COSM288785	NM_000546.5	NM_000546.5(TP53):c.413C>T(p.Ala138Val)	c.413C>T	p.Ala138Val	p.A138V	LP
RS21045812FFP	BRCA1	stop_gained	15	p.K1601*	16.61%	1409	0	17	41223130	T	A	rs80357303	-	NM_007294.3	NM_007294.3(BRCA1):c.4801A>T(p.Lys1601*)	c.4801A>T	p.Lys1601*	p.K1601*	P
RS21065645FFP	RECQL4	cn_amp	-	cn_amp	4.4	-	-	8q24.3	8q24.3	3	3	-	-	NM_004260.3	cn_amp	cn_amp	-	-	VUS
RS21065645FFP	ERCC4	cn_amp	-	cn_amp	3.8	-	-	16p13.12	16p13.12	11	11	-	-	NM_005236.2	cn_amp	cn_amp	-	-	VUS
RS21065645FFP	CSMD3	cn_amp	-	cn_amp	4.2	-	-	8q23.3	8q23.3	5	4	-	-	NM_198123.1	cn_amp	cn_amp	-	-	VUS
RS21065645FFP	BRD7	cn_amp	-	cn_amp	3.9	-	-	16q12.1	16q12.1	17	13	-	-	NM_001173984.2	cn_amp	cn_amp	-	-	VUS
RS21065645FFP	PALB2	cn_amp	-	cn_amp	3.9	-	-	16p12.2	16p12.2	13	13	-	-	NM_024675.3	cn_amp	cn_amp	-	-	VUS
RS21065645FFP	MYC	cn_amp	-	cn_amp	4.4	-	-	8q24.21	8q24.21	3	2	-	-	NM_002467.4	cn_amp	cn_amp	-	-	VUS
RS21065645FFP	GRIN2A	cn_amp	-	cn_amp	3.7	-	-	16p13.2	16p13.2	12	12	-	-	NM_000833.4	cn_amp	cn_amp	-	-	VUS
RS21065645FFP	NUP93	cn_amp	-	cn_amp	4	-	-	16q13	16q13	21	16	-	-	NM_014669.4	-	-	-	-	VUS
RS21065645FFP	NFKBIA	gene_fusion	Exon3_Intron1	NFKBIA-PSMA6	40.30%	966	-	14	35872518	14:35872518_14:35776295	14:35872518_14:35776295	-	-	NM_020529.2	NFKBIA-PSMA6(N4:P2)	-	-	-	VUS
RS21065645FFP	TSC2	gene_fusion	Intron1_Intron34	CASKIN1-TSC2	16.62%	838	-	16	2134916	16:2240871_16:2134916	16:2240871_16:2134916	-	-	NM_000548.4	CASKIN1-TSC2(C2:T35)	-	-	-	LP
RS21065645FFP	PREX2	gene_fusion	intergenic_Intron20	intergenic(HMX1,FAM90A26)-PREX2	46.77%	717	-	8	69005791	4:9007904_8:69005791	4:9007904_8:69005791	-	-	NM_024870.3	intergenic-PREX2(intergenic:P21)	-	-	-	VUS
RS21065645FFP	TP53	missense_variant	7	p.R248Q	57.80%	1628	0.0002	17	7577538	C	T	rs11540652	COSM99021,COSM99020,COSM1640830,COSM3356964,COSM10662,COSM99602	NM_000546.5	NM_000546.5(TP53):c.743G>A(p.Arg248Gln)	c.743G>A	p.Arg248Gln	p.R248Q	LP
RS21068101FFP	RECQL4	cn_amp	-	cn_amp	3.8	-	-	8q24.3	8q24.3	3	3	-	-	NM_004260.3	cn_amp	cn_amp	-	-	VUS
RS21068101FFP	MYC	cn_amp	-	cn_amp	3.7	-	-	8q24.21	8q24.21	3	2	-	-	NM_002467.4	cn_amp	cn_amp	-	-	VUS
RS21068101FFP	TERT	gene_fusion	Exon11_Intron7	TERT-ANKFN1	8.49%	2290	-	5	1264691	5:1264691_17:54493293	5:1264691_17:54493293	-	-	NM_198253.2	TERT-ANKFN1(T12:A8)	-	-	-	VUS
RS21068101FFP	NF1	splice_donor_variant	29	c.3974+1G>T	33.03%	887	0	17	29563040	G	T	-	-	NM_000267.3	NM_000267.3(NF1):c.3974+1G>T	c.3974+1G>T	-	-	LP
RS21068101FFP	MAGI2	missense_variant	5	p.G265A	31.91%	1144	6.46789e-05	7	78131065	C	G	rs752047328	-	NM_012301.3	NM_012301.3(MAGI2):c.794G>C(p.Gly265Ala)	c.794G>C	p.Gly265Ala	p.G265A	VUS
RS21068101FFP	TP53	stop_gained	6	p.R213*	39.40%	3076	8.236e-06	17	7578212	G	A	rs397516436	COSM99616,COSM99617,COSM1638393,COSM99618,COSM10654,COSM99615,COSM3378350	NM_000546.5	NM_000546.5(TP53):c.637C>T(p.Arg213*)	c.637C>T	p.Arg213*	p.R213*	P
RS21073797FFP	RECQL4	cn_amp	-	cn_amp	4.1	-	-	8q24.3	8q24.3	3	3	-	-	NM_004260.3	cn_amp	cn_amp	-	-	VUS
RS21073797FFP	ARID5B	cn_amp	-	cn_amp	4.4	-	-	10q21.2	10q21.2	4	4	-	-	NM_032199.2	cn_amp	cn_amp	-	-	VUS
RS21073797FFP	MYC	cn_amp	-	cn_amp	3.9	-	-	8q24.21	8q24.21	3	2	-	-	NM_002467.4	cn_amp	cn_amp	-	-	VUS
RS21073797FFP	TP53	missense_variant	5	p.H179L	44.22%	2164	0	17	7578394	T	A	rs1057519991	COSM129846,COSM129844,COSM43635,COSM129845,COSM3980298,COSM1731642,COSM129847	NM_000546.5	NM_000546.5(TP53):c.536A>T(p.His179Leu)	c.536A>T	p.His179Leu	p.H179L	VUS
RS21073797FFP	SMAD3	missense_variant	6	p.S264F	3.26%	1349	0	15	67473711	C	T	-	-	NM_005902.3	NM_005902.3(SMAD3):c.791C>T(p.Ser264Phe)	c.791C>T	p.Ser264Phe	p.S264F	VUS

## Sheet: mutation type
行标签	计数项:mutation_type
CN_amp	275
CN_del	14
Frameshift	25
Fusion	21
Indel	13
LGR	13
Missense	208
Promoter	1
Splice_site	34
Stop_gained	17
(空白)
总计	621
