# Supplementary material for: FGF19 promotes cell autophagy and cisplatin chemoresistance by activating MAPK signaling in ovarian cancer
Source: PeerJ. 2023 Feb 2;11:e14827. doi: 10.7717/peerj.14827 (PMC9899438; doi:10.7717/peerj.14827)
Supplement: Supplemental Information 11 [file peerj-11-14827-s011.xlsx]

## Sheet: 0
	Well	Fluoresence	Target	Content	Sample	Quantification Cycle(Cq)	Quantification Cycle Mean	Quantification Cycle standard deviation	Starting Quantity (SQ)	Log Starting Quantity	SQ Mean	SQ Std. Dev	Set Point	Well Note	ΔCq	ΔΔCq	2-ΔΔCq	平均值	SD
	E09	SYBR	GAPDH	Unkn	OVCAR3	15.58	15.58	0				0	60
	G09	SYBR	GAPDH	Unkn	OVCAR3	16.07	16.07	0				0	60
	F09	SYBR	GAPDH	Unkn	OVCAR3	15.8	15.8	0				0	60
	G08	SYBR	GAPDH	Unkn	HO8910	15.21	15.21	0				0	60
	H08	SYBR	GAPDH	Unkn	HO8910	15.22	15.22	0				0	60
	A09	SYBR	GAPDH	Unkn	HO8910	15.55	15.55	0				0	60
	D09	SYBR	GAPDH	Unkn	HO8910pm	15.39	15.39	0				0	60
	C09	SYBR	GAPDH	Unkn	HO8910pm	15.45	15.45	0				0	60
	B09	SYBR	GAPDH	Unkn	HO8910pm	15.41	15.41	0				0	60
	A08	SYBR	GAPDH	Unkn	SKOV3	15.97	15.97	0				0	60
	C08	SYBR	GAPDH	Unkn	SKOV3	15.75	15.75	0				0	60
	B08	SYBR	GAPDH	Unkn	SKOV3	15.89	15.89	0				0	60
	E08	SYBR	GAPDH	Unkn	SKOV3-IP	14.49	14.49	0				0	60
	D08	SYBR	GAPDH	Unkn	SKOV3-IP	14.48	14.48	0				0	60
	F08	SYBR	GAPDH	Unkn	SKOV3-IP	14.72	14.72	0				0	60
	B10	SYBR	GAPDH	Unkn	A2780	11.62	11.62	0
	A10	SYBR	GAPDH	Unkn	A2780	12.11	12.11	0
	H09	SYBR	GAPDH	Unkn	A2780	12.01	12.01	0
	D10	SYBR	GAPDH	Unkn	IOSE	14.96	14.96	0
	C10	SYBR	GAPDH	Unkn	IOSE	15.25	15.25	0
	E10	SYBR	GAPDH	Unkn	IOSE	15.11	15.11	0
	E02	SYBR	FGF19	Unkn	OVCAR3	36.03	36.03	0
	G02	SYBR	FGF19	Unkn	OVCAR3	36.36	36.36	0
	F02	SYBR	FGF19	Unkn	OVCAR3	36.86	36.86	0
	A02	SYBR	FGF19	Unkn	HO8910	37.05	37.05	0				0	60
	G01	SYBR	FGF19	Unkn	HO8910	37.38	37.38	0				0	60
	H01	SYBR	FGF19	Unkn	HO8910	36.4	36.4	0				0	60
	C02	SYBR	FGF19	Unkn	HO8910pm	35.75	35.75	0				0	60
	B02	SYBR	FGF19	Unkn	HO8910pm	35.41	35.41	0				0	60
	D02	SYBR	FGF19	Unkn	HO8910pm	35.94	35.94	0				0	60
	A01	SYBR	FGF19	Unkn	SKOV3	35.84	35.84	0				0	60
	B01	SYBR	FGF19	Unkn	SKOV3	35.35	35.35	0				0	60
	C01	SYBR	FGF19	Unkn	SKOV3	34.73	34.73	0				0	60
	E01	SYBR	FGF19	Unkn	SKOV3-IP	32.64	32.64	0
	D01	SYBR	FGF19	Unkn	SKOV3-IP	32.72	32.72	0
	F01	SYBR	FGF19	Unkn	SKOV3-IP	33.02	33.02	0
	A03	SYBR	FGF19	Unkn	A2780	26.68	26.68	0
	H02	SYBR	FGF19	Unkn	A2780	27.05	27.05	0
	B03	SYBR	FGF19	Unkn	A2780	26.14	26.14	0
	C03	SYBR	FGF19	Unkn	IOSE	37.49	37.49	0
	E03	SYBR	FGF19	Unkn	IOSE	37.65	37.65	0
	D03	SYBR	FGF19	Unkn	IOSE	36.51	36.51	0

## Sheet: Run Information
File Name	admin_2021-06-30 18-52-51_CT001263.pcrd
Created By User	admin
Notes
ID
Run Started	2021/6/30 18:53:00 UTC +08:00
Run Ended	2021/6/30 19:52:51 UTC +08:00
Sample Vol	20
Lid Temp	105
Protocol File Name	2021/6/30 prcl
Plate Setup File Name	Quick Plate_96 wells_SYBR Only.pltd
Base Serial Number	CT001263
Optical Head Serial Number	785BR6577
CFX Manager Version	3.1.1517.0823.
