# Supplementary material for: FGF19 promotes cell autophagy and cisplatin chemoresistance by activating MAPK signaling in ovarian cancer
Source: PeerJ. 2023 Feb 2;11:e14827. doi: 10.7717/peerj.14827 (PMC9899438; doi:10.7717/peerj.14827)
Supplement: Supplemental Information 12 [file peerj-11-14827-s012.xlsx]

## Sheet: 板 1 - Sheet1
结果
			SKOV3-IP-siCon					SKOV3-IP-siFGF19
		1	2	3	4	5	6	7	8	9	10	11	12
	A	0	0.125	0.139	0.119	0.106	0.14	0.141	0.115	0.128	0.134	0.112		490
	B	24	0.231	0.268	0.21	0.221	0.241	0.204	0.212	0.184	0.197	0.235		490
	C	48	0.654	0.592	0.483	0.557	0.529	0.489	0.473	0.508	0.532	0.561		490
	D	72	0.912	0.894	0.805	0.927	0.845	0.612	0.598	0.674	0.718	0.709		490
	E													490
	F													490
	G													490
	H													490
			SKOV3-IP+BIRB796					SKOV3-IP-siFGF19+BIRB796
		1	2	3	4	5	6	7	8	9	10	11	12
	A	0	0.137	0.125	0.128	0.119	0.138	0.136	0.143	0.14	0.153	0.129		490
	B	24	0.224	0.217	0.236	0.19	0.182	0.194	0.201	0.193	0.228	0.224		490
	C	48	0.477	0.572	0.535	0.499	0.561	0.376	0.389	0.403	0.425	0.419		490
	D	72	0.654	0.761	0.653	0.589	0.719	0.459	0.501	0.476	0.562	0.522		490
	E													490
	F													490
	G													490
	H													490
