# Supplementary material for: FGF19 promotes cell autophagy and cisplatin chemoresistance by activating MAPK signaling in ovarian cancer
Source: PeerJ. 2023 Feb 2;11:e14827. doi: 10.7717/peerj.14827 (PMC9899438; doi:10.7717/peerj.14827)
Supplement: Supplemental Information 13 [file peerj-11-14827-s013.xlsx]

## Sheet: Sheet1
OVCAR3			HO8910			HO8910-pm			SKOV3			SKOV3-IP			A2780			IOSE
Mean	SEM	N	Mean	SEM	N	Mean	SEM	N	Mean	SEM	N	Mean	SEM	N	Mean	SEM	N	Mean	SEM	N
2.84751	0.23995	3	1.40832	0.28911	3	3.55068	0.15535	3	6.37017	0.32007	3	14.7081	0.11546	3	168.714	0.26297	3	1	0.35619	3
