# Supplementary material for: FGF19 promotes cell autophagy and cisplatin chemoresistance by activating MAPK signaling in ovarian cancer
Source: PeerJ. 2023 Feb 2;11:e14827. doi: 10.7717/peerj.14827 (PMC9899438; doi:10.7717/peerj.14827)
Supplement: Supplemental Information 16 [file peerj-11-14827-s016.xlsx]

## Sheet: Sheet1
age	clinical stage	lymphatic metastasis	Abdominal and distant metastases	Ovarian cancer FGF19（IHC）	Normal ovarian FGF19（IHC）	Normal fallopian tube FGF19(IHC)
72	3c	no	yes	+
72	4	yes	yes	+++	-
70	2c	yes	no	-	-	-
68	1c	no	no	-	-
66	3c	no	yes	++
66	4	yes	yes	++	-
64	3c	no	yes	+
62	3c	no	yes	+		-
62	3c	yes	yes	++
61	3c	no	yes	++
60	2b	no	no	+	-
60	3c	no	yes	-
60	3c	yes	yes	++
60	3c	yes	yes	++	-
58	3c	yes	yes	+++
58	3c	yes	yes	++
57	3c	no	yes	++
56	2a	no	no	+	-
56	3c	no	yes	++
56	1	no	no	++	-
55	3c	yes	yes	-
55	3c	no	yes	+++
54	3c	yes	yes	-
54	3c	yes	yes	-
54	1C	no	no	++		-
54	3c	no	yes	-
53	4b	no	yes	-		-
53	1a	no	no	+	-
53	4	yes	yes	++
53	3c	no	yes	++
52	3c	no	yes	-	-
51	3c	no	yes	+++
51	3c	no	yes	++	-
51	3c	yes	yes	++
51	3c	no	yes	++
50	3c	no	yes	-		-
50	3a	no	yes	-
50	3c	yes	yes	++
50	3c	no	yes	+
50	3c	no	yes	++
49	3c	no	yes	-
49	2c	no	no	+		-
49	3c	yes	yes	++
49	3c	no	yes	-
48	3c	yes	yes	++
48	3c	yes	yes	-
48	4	no	yes	-		-
48	4	no	yes	+
47	3c	yes	yes	++
46	3c	yes	yes	-
45	3c	no	yes	-		+
45	3c	yes	yes	-
44	3c	no	yes	-	-
44	4	yes	yes	-
44	3c	no	yes	+
43	4b	yes	yes	-
42	3c	yes	yes	++
42	3c	no	yes	+
41	1c	no	no	-	-	-
41	3c	no	yes	-
40	1a	no	no	-	-	-
37	1c	no	no	-
37	2b	no	no	+		+
35	3c	no	yes	-		+
54岁	4	yes	yes	++
60岁	4	no	yes	++	-
42岁	2	no	no	-	-
49岁	1A	no	no	++
55岁	2A	no	no	++
51岁	1B	no	no	-		-
60岁	3C	no	yes	++
56岁	3C	yes	yes	+++
75岁	3C	yes	yes	+++
63岁	4	no	yes	-
43岁	3A	yes	yes	++
50岁	4	yes	yes	++	-
54岁	3C	yes	yes	++		-
48岁	3B	no	no	++
56岁	1A	no	no	++	-
62岁	4A	yes	yes	++
45岁	3C	yes	yes	++
54岁	3C	yes	yes	+		+
63岁	3C	yes	no	++
55岁	3	yes	yes	+++	-
57岁	4	yes	yes	+++
66岁	3C	yes	yes	+++		-
34岁	3A	yes	yes	+	-
70岁	3B	no	yes	+++
59岁	3C	yes	yes	++
56岁	4	no	yes	+		-
55岁	1C	no	no	-	-
49岁	3B	no	yes	++
59岁	3C	no	yes	+
54岁	3C	yes	yes	++
56岁	3C	no	yes	+	-	-
51岁	4A	yes	yes	+++
56岁	3C	no	yes	++
58岁	1B	no	no	++	-	-
67岁	3C	no	yes	++
77岁	1	no	no	-
54岁	3C	no	yes	+	+	-
65岁	4B	yes	yes	+++
68岁	3C	no	yes	-
38岁	3C	yes	yes	++	-	+
47岁	4	no	yes	+
45岁	2B	no	no	-	-	-
65岁	3C	no	yes	+
68岁	3C	no	yes	++
45岁	3C	yes	yes	-
42岁	3C	yes	yes	-
54岁	3C	yes	yes	-
50岁	3C	yes	yes	-
53岁	3C	no	yes	++
50岁	2C	no	no	-
49岁	1C	no	no	-
46岁	3C	yes	yes	++
47岁	3C	yes	yes	-
66岁	3C	yes	yes	++
